# Supplementary material for: Theoretical insights into the reactivity of Fe-based catalysts for water oxidation: the role of electron-withdrawing groups
Source: Royal Society of Chemistry journal article supplement (doi:10.1039/c8cp00687c), 2018-01-01
Supplement: c8cp00687c1.pdf [file c8cp00687c1.pdf]

Supporting Information for

## **Theoretical insights into the reactivity of Fe-based catalysts for water oxidation: The role of electron-withdrawing groups**

Penglin Xu,<sup>a</sup> Shaojin Hu,<sup>a</sup> Hou-Dao Zhang<sup>\*b</sup> and Xiao Zheng<sup>\*a</sup>

*<sup>a</sup>Hefei National Laboratory for Physical Sciences at the Microscale & Synergetic Innovation  
Center of Quantum Information and Quantum Physics, University of Science and Technology of  
China, Hefei, Anhui 230026, China*

*<sup>b</sup>Department of Chemical Physics, University of Science and Technology of China, Hefei, Anhui  
230026, China*

E-mail: [hdz@ustc.edu.cn](mailto:hdz@ustc.edu.cn), [xz58@ustc.edu.cn](mailto:xz58@ustc.edu.cn)

This supplemental file includes the following materials:

1. Some details on theoretical methods and computational procedures (p. S1)
2. Energy profiles for O-O bond-formation with complex **(1)** and complex **(4)** by using B3LYP functional calculation (p.S2-S3)
3. The bond length, bond order of Fe-O and Mulliken spin population on Oxygen atom calculated by different methods. (p.S3)
4. Optimized geometric structures of complexes **(1)** to **(6)** (and some related species) (p. S5-S52).

## **1. Some details on theoretical methods and computational procedures.**

Molecular geometries and electronic structures are obtained by carrying out density functional theory (DFT) calculations with the  $\omega$ B97XD dispersion-corrected density functional.<sup>1</sup> The hybrid B3LYP exchange-correlation functional<sup>2,3</sup> is also used to extract from the single-point calculations at the structures obtained with the  $\omega$ B97XD functional for the complex **(1)** and complex **(4)** in the Supporting Information (See section 3, Supporting Information) for a comparison purpose. The geometry optimization and subsequent frequency analysis are performed with the 6-31G\* basis set. The calculation involves spin densities of multiple atoms, so broken-symmetry (BS) approximation is adopted in the framework of DFT. To calculate the transition states, the QST3 and TS algorithms of the Gaussian09 suite of program is adopted. All minima and TSs were verified by no and one imaginary frequency in harmonic vibrational analysis.

The energetic data onto iron species are extracted from the single-point calculations done at the optimized geometries, with the correlation consistent cc-pVTZ basis set<sup>4,5</sup> for all the atoms.

To account for the solvation effects due to water environment, the polarizable continuum model (PCM) of Truhlar and co-workers<sup>6</sup> are adopted for geometry optimization directly using the B3LYP and the  $\omega$ B97XD functional.

## **2. Energy profiles for O-O bond-formation for complex (1) and complex (4) with the oxyl radical mechanism calculated by B3LYP functional.**

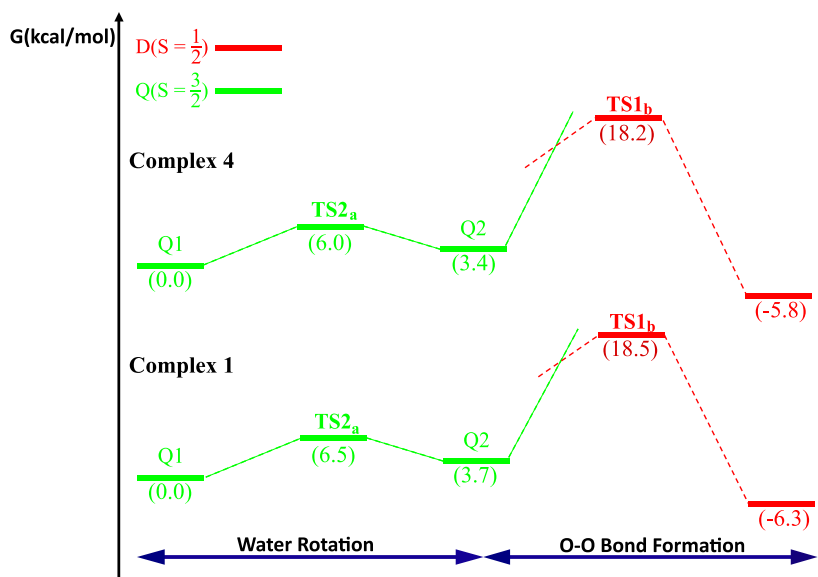

**Figure S1.** Energy profiles for O-O bond-formation with complex **(1)** and **(4)** ( $L^{N4} = \text{Pytacn}$ ). The red and green lines represent the pathways taking D ( $S=1/2$ ) and Q ( $S=3/2$ ) as the reactant respectively. In order to simplify the figure, which just represents the minimum energy pathways. The  $TS_a$  represents the transition state of the water rotation step and the  $TS_b$  represents the transition state of the O-O bond formation step.

### 3. The bond length, bond order of Fe-O and Mulliken spin population on oxygen atom calculated by different methods.

| Method                  | BLYP | B3LYP | $\omega$ B97 | $\omega$ B97XD | MP2  | <sup>a</sup> B3LYP-D3 |
|-------------------------|------|-------|--------------|----------------|------|-----------------------|
| Bond length of Fe-O (Å) | 1.68 | 1.70  | 1.72         | 1.81           | 1.75 | 1.63                  |
| Bond order of Fe-O      | 1.20 | 1.15  | 1.18         | 1.07           | 0.97 | 1.73                  |
| Mulliken spin on O atom | 0.74 | 0.80  | 0.89         | 0.79           | 0.77 | 0.84                  |

**Table S1** The bond length, bond order of Fe-O and Mulliken spin population on oxygen atom (which is directly linked to iron atom) calculated by different methods. <sup>a</sup>The results of B3LYP-D3<sup>7,8</sup> functional is calculated by the ORCA program.<sup>9-11</sup>

### 4. Optimized geometric structures of complexes (1) to (6) (And some related species).

Cartesian coordinates of reactant state associated with the process of the water rotation for  $\text{Fe}^{\text{IV}}$ -

oxyl radical (S=2) in complex (1):

|    |             |             |             |
|----|-------------|-------------|-------------|
| N  | -2.26999800 | -0.00866000 | -0.30840800 |
| C  | -2.68588200 | -0.98899400 | 0.73516200  |
| C  | -1.85364500 | -0.80042600 | 1.98149200  |
| N  | -0.40300500 | -0.66661200 | 1.68013300  |
| C  | 0.29732000  | -1.94900700 | 1.44513300  |
| C  | -0.02217600 | -2.51241900 | 0.08598800  |
| N  | -0.10845200 | -1.42247900 | -0.93756300 |
| C  | -2.36839900 | -0.61072700 | -1.65548600 |
| C  | -1.26502800 | -1.64845300 | -1.86743300 |
| C  | 1.17302600  | -1.30877700 | -1.68424800 |
| C  | 2.16692600  | -0.55069500 | -0.86634000 |
| N  | 1.63578200  | 0.39225900  | -0.07390200 |
| C  | 2.42213000  | 1.19824600  | 0.64530800  |
| C  | 3.79787600  | 1.08230100  | 0.59968200  |
| C  | 4.35962700  | 0.09962000  | -0.20397900 |
| C  | 3.53314000  | -0.73093700 | -0.94794600 |
| Fe | -0.33331500 | 0.41820700  | -0.06348600 |
| C  | -3.11622800 | 1.19875800  | -0.24609900 |
| C  | 0.24052500  | -0.03164500 | 2.84991800  |
| H  | -2.60337700 | -1.99523600 | 0.33062800  |
| H  | -3.74043200 | -0.82857800 | 0.96981100  |
| H  | -2.01509600 | -1.62704900 | 2.67956800  |
| H  | -2.15273200 | 0.12785800  | 2.47199600  |
| H  | 0.02730200  | -2.66944600 | 2.22269700  |
| H  | 1.36641700  | -1.74692300 | 1.53114300  |
| H  | -0.95999900 | -3.05958100 | 0.09608000  |
| H  | 0.75611700  | -3.21905500 | -0.20829300 |
| H  | -2.26745100 | 0.20305000  | -2.37185600 |
| H  | -3.35824600 | -1.06057500 | -1.77525200 |
| H  | -0.90766700 | -1.57568900 | -2.89388000 |
| H  | -1.63032300 | -2.66347200 | -1.71889200 |
| H  | 1.53601800  | -2.30019700 | -1.96147800 |
| H  | 1.91922200  | 1.93606000  | 1.25925100  |
| H  | 4.41122700  | 1.74941100  | 1.19208300  |
| H  | 5.43559600  | -0.02332700 | -0.25133800 |
| H  | 3.93328100  | -1.50955800 | -1.58652600 |
| H  | -3.12286400 | 1.57446600  | 0.77699300  |
| H  | -2.70507700 | 1.95397700  | -0.91571000 |
| H  | -4.13329900 | 0.93953800  | -0.55403200 |
| H  | -0.21096300 | 0.94215200  | 3.02897400  |
| H  | 0.09628500  | -0.67499500 | 3.72368300  |
| H  | 1.30847400  | 0.08700700  | 2.66491200  |

|   |             |             |             |
|---|-------------|-------------|-------------|
| H | 0.98175300  | -0.74247700 | -2.59892100 |
| O | -0.51182800 | 1.79253100  | 0.97839400  |
| O | -0.30411200 | 1.06501300  | -1.47638100 |
| H | -0.60586400 | 2.59406500  | 0.39569000  |
| O | -0.73418600 | 3.76024200  | -0.79656400 |
| H | -0.66815700 | 3.06182800  | -1.46454500 |
| H | -1.67851400 | 3.96846400  | -0.78448200 |

Cartesian coordinates of transient state (TS<sub>2a</sub>) associated with the process of the water rotation for Fe<sup>IV</sup>-oxyl radical (S=2) in complex (**1**):

|    |             |             |             |
|----|-------------|-------------|-------------|
| N  | -2.30558300 | 0.01392200  | -0.17717700 |
| C  | -2.66029000 | -1.18272200 | 0.65934800  |
| C  | -1.72818700 | -1.29764200 | 1.84351300  |
| N  | -0.29467800 | -1.12014600 | 1.46421700  |
| C  | 0.32556800  | -2.31673900 | 0.84517500  |
| C  | -0.11439900 | -2.46149900 | -0.58981900 |
| N  | -0.13026000 | -1.12436100 | -1.27437200 |
| C  | -2.48877500 | -0.29581000 | -1.63029100 |
| C  | -1.28208200 | -1.04295000 | -2.23749600 |
| C  | 1.18595200  | -0.86281400 | -1.93625400 |
| C  | 2.16476800  | -0.29830600 | -0.94872500 |
| N  | 1.62724400  | 0.46071200  | 0.02901800  |
| C  | 2.41136800  | 1.10817300  | 0.90191300  |
| C  | 3.79092800  | 1.00922300  | 0.83471300  |
| C  | 4.35984200  | 0.21178300  | -0.15393300 |
| C  | 3.53697200  | -0.45212000 | -1.05825800 |
| Fe | -0.33937600 | 0.45687000  | 0.00060500  |
| C  | -3.19192400 | 1.15096200  | 0.17993400  |
| C  | 0.45350300  | -0.83587100 | 2.71421700  |
| H  | -2.64841600 | -2.07267400 | 0.03567700  |
| H  | -3.68739900 | -1.06864100 | 1.01487100  |
| H  | -1.86377800 | -2.26215000 | 2.34336900  |
| H  | -1.95775800 | -0.50628400 | 2.56018500  |
| H  | 0.06426400  | -3.21602000 | 1.41260000  |
| H  | 1.40764800  | -2.18639100 | 0.90256700  |
| H  | -1.10487200 | -2.90009700 | -0.65651500 |
| H  | 0.56355400  | -3.12558300 | -1.12993200 |
| H  | -2.61500600 | 0.65643900  | -2.14336800 |
| H  | -3.41343200 | -0.86720100 | -1.74471600 |
| H  | -0.94550500 | -0.50067900 | -3.11952800 |
| H  | -1.54418100 | -2.05514900 | -2.54686400 |
| H  | 1.56263800  | -1.77290900 | -2.40628300 |
| H  | 1.90532700  | 1.69720100  | 1.65709000  |

|   |             |             |             |
|---|-------------|-------------|-------------|
| H | 4.40055800  | 1.54372600  | 1.55303700  |
| H | 5.43709900  | 0.10564800  | -0.22223200 |
| H | 3.94430900  | -1.07852000 | -1.84340800 |
| H | -3.22735500 | 1.26817700  | 1.26532300  |
| H | -2.82307800 | 2.06641800  | -0.28386900 |
| H | -4.20561700 | 0.93826700  | -0.17248500 |
| H | 0.06835600  | 0.06981200  | 3.17746800  |
| H | 0.32962400  | -1.68194000 | 3.39913000  |
| H | 1.51477200  | -0.71388000 | 2.49911000  |
| H | 1.03173100  | -0.11609900 | -2.71918200 |
| O | -0.42866800 | 1.52063400  | 1.40142200  |
| O | -0.38504300 | 1.37628900  | -1.28191500 |
| O | -0.93436800 | 4.02987200  | -0.33209600 |
| H | -0.89864700 | 3.25967800  | -0.91968600 |
| H | -1.33714200 | 1.66950900  | 1.71023600  |
| H | -1.15401600 | 3.62535400  | 0.51945600  |

Cartesian coordinates of reactant state associated with the process of O-O bond formation for Fe<sup>IV</sup>-oxyl radical (S=2) in complex (**1**):

|    |             |             |             |
|----|-------------|-------------|-------------|
| N  | -2.28150000 | 0.05497300  | -0.18056800 |
| C  | -2.68257900 | -0.83406200 | 0.96029000  |
| C  | -1.72919200 | -0.66465100 | 2.11882500  |
| N  | -0.30009600 | -0.69008900 | 1.67828000  |
| C  | 0.23533400  | -2.05602400 | 1.44708700  |
| C  | -0.26117400 | -2.60717700 | 0.13404500  |
| N  | -0.25122500 | -1.53902400 | -0.92163000 |
| C  | -2.54662000 | -0.63089700 | -1.47889600 |
| C  | -1.45866300 | -1.67011100 | -1.81526500 |
| C  | 1.02803800  | -1.58224400 | -1.69377500 |
| C  | 2.10237300  | -0.84833300 | -0.94810400 |
| N  | 1.67332100  | 0.20896600  | -0.22996300 |
| C  | 2.54569200  | 1.00653200  | 0.39848000  |
| C  | 3.90776000  | 0.76616300  | 0.33695600  |
| C  | 4.36412000  | -0.33483200 | -0.37961700 |
| C  | 3.44932000  | -1.15565500 | -1.03175500 |
| Fe | -0.29603400 | 0.35551600  | -0.17686700 |
| C  | -3.05396900 | 1.31966800  | -0.12590000 |
| C  | 0.50550300  | -0.09504800 | 2.77476800  |
| H  | -2.72663900 | -1.86275400 | 0.61204200  |
| H  | -3.69667100 | -0.56952600 | 1.26934800  |
| H  | -1.90012700 | -1.43504200 | 2.87656800  |
| H  | -1.89253000 | 0.31323300  | 2.57879400  |
| H  | -0.05074000 | -2.71848400 | 2.26980200  |

|   |             |             |             |
|---|-------------|-------------|-------------|
| H | 1.32341300  | -1.97856700 | 1.44026000  |
| H | -1.26845100 | -3.00079100 | 0.22557800  |
| H | 0.37420500  | -3.43305300 | -0.19143000 |
| H | -2.56899000 | 0.14073400  | -2.24735000 |
| H | -3.53478800 | -1.09556100 | -1.43134600 |
| H | -1.13870400 | -1.51843100 | -2.84458800 |
| H | -1.83643700 | -2.68879500 | -1.73137100 |
| H | 1.30664700  | -2.61585600 | -1.90620300 |
| H | 2.12597000  | 1.83380800  | 0.95681400  |
| H | 4.58953000  | 1.42987800  | 0.85445500  |
| H | 5.42500000  | -0.55401700 | -0.43181800 |
| H | 3.76682700  | -2.02178500 | -1.60055100 |
| H | -3.00120800 | 1.73393900  | 0.88256600  |
| H | -2.64616200 | 2.03166900  | -0.84467800 |
| H | -4.10174800 | 1.11149500  | -0.36145100 |
| H | 0.19382200  | 0.93222900  | 2.95089400  |
| H | 0.35475500  | -0.68734000 | 3.68341200  |
| H | 1.56373200  | -0.11117300 | 2.51378800  |
| H | 0.86959100  | -1.06741900 | -2.64477600 |
| O | -0.16530500 | 1.80712200  | 0.81210100  |
| O | -0.34519900 | 0.86458500  | -1.65325100 |
| H | -1.00497900 | 2.11065500  | 1.19602100  |
| O | 0.20223900  | 3.70406300  | -1.23227800 |
| H | 0.52927300  | 3.09409600  | -1.90518200 |
| H | 0.12143700  | 3.12996600  | -0.44715500 |

Cartesian coordinates of transient state (TS<sub>2b</sub>) associated with the process of O-O bond formation for Fe<sup>IV</sup>-oxyl radical (S=2) in complex (1):

|   |             |             |             |
|---|-------------|-------------|-------------|
| N | -2.34284300 | 0.19300200  | -0.24040000 |
| C | -2.83794100 | -0.87884600 | 0.69625700  |
| C | -1.96191000 | -0.92545500 | 1.92982500  |
| N | -0.50117400 | -0.91679000 | 1.58411300  |
| C | 0.01307200  | -2.22302200 | 1.06238800  |
| C | -0.33865900 | -2.43320900 | -0.40186300 |
| N | -0.21566800 | -1.14999100 | -1.20558100 |
| C | -2.52039700 | -0.21890000 | -1.67512400 |
| C | -1.33611800 | -1.05749500 | -2.21202100 |
| C | 1.12833400  | -1.06168400 | -1.86862700 |
| C | 2.14961000  | -0.53491500 | -0.90180900 |
| N | 1.66329100  | 0.29239900  | 0.05326300  |
| C | 2.50658000  | 0.91102900  | 0.90099900  |
| C | 3.87958400  | 0.71620100  | 0.83073600  |
| C | 4.38914600  | -0.15073400 | -0.13610300 |

|    |             |             |             |
|----|-------------|-------------|-------------|
| C  | 3.51253100  | -0.78559600 | -1.01427400 |
| Fe | -0.31920100 | 0.44814900  | -0.01133800 |
| C  | -3.11938100 | 1.44265200  | -0.00153000 |
| C  | 0.23601300  | -0.60506400 | 2.84291100  |
| H  | -2.86184800 | -1.83239400 | 0.17510100  |
| H  | -3.86982700 | -0.65481600 | 0.98237600  |
| H  | -2.19687000 | -1.80582500 | 2.53888100  |
| H  | -2.13926600 | -0.03370000 | 2.53571100  |
| H  | -0.38344400 | -3.04993500 | 1.66229800  |
| H  | 1.09655800  | -2.21088500 | 1.18885800  |
| H  | -1.35333400 | -2.80320700 | -0.51656700 |
| H  | 0.32296100  | -3.18662100 | -0.83665300 |
| H  | -2.59705100 | 0.69715200  | -2.25948300 |
| H  | -3.46816100 | -0.75662000 | -1.76931700 |
| H  | -0.94419100 | -0.57515800 | -3.10610400 |
| H  | -1.64186700 | -2.06863700 | -2.48743900 |
| H  | 1.41592000  | -2.02946200 | -2.28697400 |
| H  | 2.05645600  | 1.56599700  | 1.63622500  |
| H  | 4.52879600  | 1.23299200  | 1.52823000  |
| H  | 5.45713900  | -0.33044800 | -0.20690700 |
| H  | 3.87089800  | -1.46199700 | -1.78241000 |
| H  | -3.13080900 | 1.66889700  | 1.06621300  |
| H  | -2.66446400 | 2.26745400  | -0.55062600 |
| H  | -4.15157900 | 1.29987000  | -0.33915200 |
| H  | -0.07818300 | 0.36568000  | 3.22506500  |
| H  | 0.01466100  | -1.37559100 | 3.59051600  |
| H  | 1.30974000  | -0.59323200 | 2.65884100  |
| H  | 1.04615200  | -0.34740200 | -2.69249200 |
| O  | -0.28438400 | 1.93597200  | 1.28594700  |
| O  | -0.28608500 | 1.47767400  | -1.30462400 |
| H  | -1.11920600 | 2.08209600  | 1.76712700  |
| O  | -0.14888735 | 3.33091539  | -0.88239790 |
| H  | -1.02845635 | 3.59088639  | -1.21895190 |
| H  | -0.11628405 | 2.77619965  | 0.33182785  |

Cartesian coordinates of product state associated with the process of O-O bond formation for Fe<sup>IV</sup>-oxyl radical (S=2) in complex (**1**):

|   |             |             |             |
|---|-------------|-------------|-------------|
| N | -2.34106400 | -0.43432000 | 0.06566900  |
| C | -2.89807800 | 0.95942500  | 0.08351700  |
| C | -2.12749000 | 1.83097500  | -0.89081000 |
| N | -0.64053100 | 1.65511700  | -0.76066700 |
| C | -0.04225600 | 2.40200800  | 0.39111900  |
| C | -0.30581700 | 1.71816900  | 1.72676000  |



|    |             |             |             |
|----|-------------|-------------|-------------|
| N  | -0.25563300 | 0.20200900  | 1.61913300  |
| C  | -2.42125900 | -1.05917000 | 1.42011400  |
| C  | -1.39911600 | -0.43238300 | 2.38322300  |
| C  | 1.07288000  | -0.30390500 | 2.09246000  |
| C  | 2.11281700  | -0.09102400 | 1.02644500  |
| N  | 1.65382500  | -0.13428500 | -0.24841100 |
| C  | 2.52639800  | -0.05083000 | -1.27024000 |
| C  | 3.89227100  | 0.08714400  | -1.06034000 |
| C  | 4.36934900  | 0.15214100  | 0.24879100  |
| C  | 3.46645400  | 0.06298200  | 1.30662400  |
| Fe | -0.32890600 | -0.33302600 | -0.31400100 |
| C  | -3.10197500 | -1.26743200 | -0.90344800 |
| C  | -0.02313600 | 2.18440800  | -2.00937100 |
| H  | -2.85674500 | 1.34749400  | 1.09901500  |
| H  | -3.95585800 | 0.93730000  | -0.19693700 |
| H  | -2.39123300 | 2.88676100  | -0.76135600 |
| H  | -2.38302300 | 1.54195600  | -1.91280100 |
| H  | -0.43269600 | 3.42604400  | 0.41639700  |
| H  | 1.02998300  | 2.46225400  | 0.20065100  |
| H  | -1.27854400 | 2.00500700  | 2.11671600  |
| H  | 0.43665000  | 2.04955600  | 2.45740300  |
| H  | -2.21214500 | -2.11989100 | 1.28703800  |
| H  | -3.43838000 | -0.95858200 | 1.81539100  |
| H  | -1.00338400 | -1.20735100 | 3.04058300  |
| H  | -1.85854200 | 0.32421300  | 3.01967900  |
| H  | 1.35270000  | 0.17210300  | 3.03638000  |
| H  | 2.10752200  | -0.10000000 | -2.26765000 |
| H  | 4.56122500  | 0.14805100  | -1.91131700 |
| H  | 5.43037000  | 0.27125400  | 0.44433000  |
| H  | 3.79819900  | 0.10666000  | 2.33823800  |
| H  | -3.14793000 | -0.75750700 | -1.86796200 |
| H  | -2.60755500 | -2.23248300 | -1.02212400 |
| H  | -4.12368800 | -1.42253800 | -0.53832400 |
| H  | -0.40285500 | 1.63662400  | -2.87136400 |
| H  | -0.27299900 | 3.24645400  | -2.11936900 |
| H  | 1.06119800  | 2.08177400  | -1.96445700 |
| H  | 0.97830700  | -1.37841100 | 2.26810000  |
| O  | -0.21525300 | -0.79756700 | -2.26023000 |
| O  | -0.20622600 | -2.09746700 | 0.11570700  |
| H  | -1.06349600 | -0.77116400 | -2.73798200 |
| O  | 0.60515100  | -2.83324800 | -0.85828500 |
| H  | 0.06087100  | -3.63624200 | -0.97050900 |
| H  | 0.05178600  | -1.74911200 | -2.21040400 |

Cartesian coordinates of reactant state associated with the process of the water rotation for Fe<sup>IV</sup>-oxyl radical (S=4) in complex (1):

|    |             |             |             |
|----|-------------|-------------|-------------|
| N  | -2.29314700 | -0.06539500 | -0.30081800 |
| C  | -2.68860500 | -1.09439800 | 0.72884500  |
| C  | -1.86237000 | -0.93058100 | 1.98870000  |
| N  | -0.39967000 | -0.77260200 | 1.69789200  |
| C  | 0.30443700  | -2.05094700 | 1.37242100  |
| C  | 0.00892700  | -2.53709300 | -0.03862300 |
| N  | -0.07437800 | -1.39161300 | -1.03091500 |
| C  | -2.38603100 | -0.62294700 | -1.69020200 |
| C  | -1.22708000 | -1.58785700 | -1.99407100 |
| C  | 1.22568700  | -1.22876700 | -1.76196300 |
| C  | 2.21046000  | -0.50918400 | -0.88965400 |
| N  | 1.66316000  | 0.38643100  | -0.03442800 |
| C  | 2.44436200  | 1.17198500  | 0.73006100  |
| C  | 3.82848000  | 1.07727700  | 0.67422300  |
| C  | 4.40797700  | 0.14443900  | -0.18553800 |
| C  | 3.58910800  | -0.66012500 | -0.97660800 |
| Fe | -0.33450300 | 0.43502500  | -0.06548000 |
| C  | -3.18309000 | 1.12805400  | -0.19131000 |
| C  | 0.23338100  | -0.20723700 | 2.92236200  |
| H  | -2.58836100 | -2.08595400 | 0.29438600  |
| H  | -3.74810900 | -0.95829400 | 0.96309100  |
| H  | -2.02097900 | -1.78307400 | 2.65881200  |
| H  | -2.17406500 | -0.02505900 | 2.51262000  |
| H  | 0.02274000  | -2.82598200 | 2.09435800  |
| H  | 1.37203600  | -1.86245700 | 1.49118200  |
| H  | -0.92569200 | -3.08954100 | -0.07291100 |
| H  | 0.79444400  | -3.22670600 | -0.35852800 |
| H  | -2.35963300 | 0.22742800  | -2.37007500 |
| H  | -3.35514700 | -1.12026600 | -1.79921000 |
| H  | -0.87436100 | -1.40550400 | -3.00869700 |
| H  | -1.54507200 | -2.62916500 | -1.94207400 |
| H  | 1.59989700  | -2.19974100 | -2.09555300 |
| H  | 1.93706500  | 1.87366200  | 1.38038000  |
| H  | 4.43184300  | 1.72421200  | 1.30053900  |
| H  | 5.48698500  | 0.04326500  | -0.24097900 |
| H  | 4.00323500  | -1.39439400 | -1.65860900 |
| H  | -3.20628400 | 1.46583200  | 0.84415500  |
| H  | -2.80636300 | 1.92407800  | -0.83290600 |
| H  | -4.19069500 | 0.83915300  | -0.50765100 |
| H  | -0.21230900 | 0.75925300  | 3.15236100  |
| H  | 0.07180300  | -0.89331500 | 3.76203800  |

|   |             |             |             |
|---|-------------|-------------|-------------|
| H | 1.30565300  | -0.08853700 | 2.76763400  |
| H | 1.03945300  | -0.61283500 | -2.64588700 |
| O | -0.56396700 | 1.81426000  | 0.99323100  |
| O | -0.32203000 | 1.23912000  | -1.49597500 |
| H | -0.66187800 | 2.65185000  | 0.44838800  |
| O | -0.84386700 | 3.96790600  | -0.61294500 |
| H | -0.76756100 | 3.40861700  | -1.40806100 |
| H | -1.79826500 | 4.14909100  | -0.55478200 |

Cartesian coordinates of transient state (TS<sub>2a</sub>) associated with the process of the water rotation for Fe<sup>IV</sup>-oxyl radical (S=4) in complex (**1**):

|    |             |             |             |
|----|-------------|-------------|-------------|
| N  | -2.29150400 | -0.11007400 | -0.23400800 |
| C  | -2.59375400 | -1.35255500 | 0.56346600  |
| C  | -1.74536900 | -1.38961900 | 1.81654600  |
| N  | -0.29854300 | -1.11699400 | 1.53100500  |
| C  | 0.44104600  | -2.26816800 | 0.92884200  |
| C  | 0.11835500  | -2.45949100 | -0.54314600 |
| N  | -0.04254400 | -1.13666200 | -1.27197200 |
| C  | -2.40024400 | -0.35908600 | -1.70934300 |
| C  | -1.21370200 | -1.18179500 | -2.23283300 |
| C  | 1.22765800  | -0.77029800 | -1.98485700 |
| C  | 2.21392000  | -0.22111600 | -1.00055800 |
| N  | 1.66299700  | 0.46689500  | 0.02721200  |
| C  | 2.43578600  | 1.09343000  | 0.93209700  |
| C  | 3.82090800  | 1.03962200  | 0.84662900  |
| C  | 4.40660800  | 0.31697400  | -0.19229100 |
| C  | 3.59347100  | -0.32163900 | -1.12792600 |
| Fe | -0.33984700 | 0.44996800  | 0.06746600  |
| C  | -3.24369700 | 0.98058300  | 0.14433400  |
| C  | 0.35268000  | -0.79500000 | 2.83137000  |
| H  | -2.43812100 | -2.22334500 | -0.06688500 |
| H  | -3.65353000 | -1.33785800 | 0.83185500  |
| H  | -1.85021000 | -2.35845800 | 2.31707000  |
| H  | -2.07661000 | -0.61065400 | 2.50652700  |
| H  | 0.20906500  | -3.18767200 | 1.47821500  |
| H  | 1.50407400  | -2.06346300 | 1.06153700  |
| H  | -0.79406500 | -3.03434400 | -0.67279300 |
| H  | 0.92066600  | -3.02583400 | -1.02194900 |
| H  | -2.43074300 | 0.61747000  | -2.19036600 |
| H  | -3.35181200 | -0.86638500 | -1.89843800 |
| H  | -0.89870000 | -0.77662700 | -3.19349100 |
| H  | -1.48353700 | -2.22635800 | -2.38887300 |
| H  | 1.61689700  | -1.63598700 | -2.52631700 |

|   |             |             |             |
|---|-------------|-------------|-------------|
| H | 1.92289300  | 1.63422700  | 1.71793400  |
| H | 4.41862400  | 1.55317000  | 1.59076100  |
| H | 5.48650800  | 0.24931600  | -0.27413900 |
| H | 4.01187400  | -0.89175100 | -1.94980500 |
| H | -3.30417100 | 1.05248600  | 1.23114000  |
| H | -2.90946900 | 1.92747600  | -0.27982700 |
| H | -4.23185000 | 0.72221900  | -0.24927700 |
| H | -0.11158900 | 0.08861500  | 3.26529800  |
| H | 0.23269200  | -1.64674000 | 3.51081700  |
| H | 1.41701500  | -0.61338300 | 2.68073300  |
| H | 0.99391200  | 0.01377700  | -2.70945000 |
| O | -0.44292300 | 1.61441900  | 1.41258100  |
| O | -0.41250300 | 1.49753800  | -1.21557700 |
| O | -1.41960800 | 4.06780200  | -0.44489300 |
| H | -1.02636500 | 3.24229700  | -0.79131100 |
| H | -1.34137400 | 1.79341900  | 1.74647200  |
| H | -1.49062300 | 3.87395100  | 0.50391800  |

Cartesian coordinates of reactant state associated with the process of O-O bond formation for Fe<sup>IV</sup>-oxyl radical (S=4) in complex (**1**):

|    |             |             |             |
|----|-------------|-------------|-------------|
| N  | -2.27829600 | 0.07117700  | -0.18466100 |
| C  | -2.69691200 | -0.85212800 | 0.93167300  |
| C  | -1.79970500 | -0.66360700 | 2.13724700  |
| N  | -0.34439900 | -0.64103000 | 1.76565300  |
| C  | 0.24097300  | -1.99360100 | 1.49283700  |
| C  | -0.18589000 | -2.55770500 | 0.14851000  |
| N  | -0.24200500 | -1.48981000 | -0.93204400 |
| C  | -2.50800800 | -0.56110400 | -1.52420200 |
| C  | -1.47261300 | -1.65930800 | -1.80552000 |
| C  | 1.01221100  | -1.51014800 | -1.76060400 |
| C  | 2.11826900  | -0.84121400 | -1.00315300 |
| N  | 1.71357900  | 0.15984700  | -0.18635300 |
| C  | 2.61210400  | 0.91232100  | 0.47552000  |
| C  | 3.97400300  | 0.67044300  | 0.35592600  |
| C  | 4.40664300  | -0.37281600 | -0.46193200 |
| C  | 3.46710200  | -1.13904300 | -1.15062200 |
| Fe | -0.26993600 | 0.40110200  | -0.10607700 |
| C  | -3.04626600 | 1.34872100  | -0.10258200 |
| C  | 0.39596300  | -0.08303000 | 2.93490900  |
| H  | -2.68870600 | -1.87566600 | 0.56693000  |
| H  | -3.73076000 | -0.61819800 | 1.20000300  |
| H  | -1.98444600 | -1.45035700 | 2.87653400  |
| H  | -2.01513500 | 0.30005600  | 2.60279600  |

|   |             |             |             |
|---|-------------|-------------|-------------|
| H | -0.05052100 | -2.68745300 | 2.28934100  |
| H | 1.32501100  | -1.88189300 | 1.53255200  |
| H | -1.16129800 | -3.03020300 | 0.21413500  |
| H | 0.51983400  | -3.33303600 | -0.15918000 |
| H | -2.43475900 | 0.23452400  | -2.26411100 |
| H | -3.52704100 | -0.96015100 | -1.54772600 |
| H | -1.17157800 | -1.60581400 | -2.85110200 |
| H | -1.87894000 | -2.65568400 | -1.63221500 |
| H | 1.25936900  | -2.53560300 | -2.04573400 |
| H | 2.21782600  | 1.70993400  | 1.09252800  |
| H | 4.67345800  | 1.29354000  | 0.90121200  |
| H | 5.46522600  | -0.58835900 | -0.56444200 |
| H | 3.76457100  | -1.95594700 | -1.79847800 |
| H | -2.97631200 | 1.74674600  | 0.90934400  |
| H | -2.63914500 | 2.06988500  | -0.80974600 |
| H | -4.09336800 | 1.13577900  | -0.34205400 |
| H | -0.02239200 | 0.88048800  | 3.23275100  |
| H | 0.29227400  | -0.76780500 | 3.78406400  |
| H | 1.45307900  | 0.02993900  | 2.69625200  |
| H | 0.82151100  | -0.93681900 | -2.67151200 |
| O | -0.25916200 | 1.98322500  | 0.71119000  |
| O | -0.27927000 | 1.07574900  | -1.60032500 |
| H | -0.24959900 | 1.93292200  | 1.68449100  |
| O | -0.87879100 | 3.98423100  | -1.22453600 |
| H | -0.69723100 | 3.33850300  | -1.92728200 |
| H | -0.71768100 | 3.44722100  | -0.42322700 |

Cartesian coordinates of transient state (TS<sub>2</sub>) associated with the process of O-O bond formation for Fe<sup>IV</sup>-oxyl radical (S=4) in complex (1):

|   |             |             |             |
|---|-------------|-------------|-------------|
| N | -2.39407900 | -0.01904000 | -0.39251500 |
| C | -2.81791100 | -0.97045100 | 0.68433500  |
| C | -2.05327000 | -0.68905000 | 1.96563900  |
| N | -0.57055800 | -0.54756100 | 1.74889700  |
| C | 0.15060200  | -1.84759400 | 1.56358900  |
| C | -0.06402600 | -2.48041100 | 0.19237300  |
| N | -0.12949900 | -1.47236000 | -0.92289700 |
| C | -2.38041200 | -0.65568100 | -1.73490700 |
| C | -1.28139800 | -1.73176600 | -1.84868600 |
| C | 1.16193300  | -1.38673200 | -1.64885300 |
| C | 2.19665000  | -0.67296500 | -0.81723000 |
| N | 1.73302700  | 0.29848400  | -0.00406500 |
| C | 2.59360100  | 1.04101800  | 0.71772100  |
| C | 3.96527500  | 0.82882300  | 0.66400900  |
| C | 4.45407300  | -0.18608700 | -0.15879900 |

|    |             |             |             |
|----|-------------|-------------|-------------|
| C  | 3.55852000  | -0.94723700 | -0.90772600 |
| Fe | -0.36199600 | 0.58507600  | -0.02731800 |
| C  | -3.25831300 | 1.18907500  | -0.39693300 |
| C  | -0.00376500 | 0.10603500  | 2.96465300  |
| H  | -2.67444100 | -1.99115100 | 0.33760000  |
| H  | -3.89054400 | -0.85288600 | 0.87138600  |
| H  | -2.24043900 | -1.47417400 | 2.70701800  |
| H  | -2.39206800 | 0.26089500  | 2.38532200  |
| H  | -0.16967400 | -2.54826600 | 2.34375800  |
| H  | 1.20849800  | -1.64040200 | 1.72558300  |
| H  | -0.97917400 | -3.06768400 | 0.18795500  |
| H  | 0.75469700  | -3.18274100 | 0.00354900  |
| H  | -2.20763000 | 0.14200800  | -2.45766800 |
| H  | -3.36130100 | -1.09965800 | -1.94328500 |
| H  | -0.92256900 | -1.74995900 | -2.87925600 |
| H  | -1.68694000 | -2.72275600 | -1.63905700 |
| H  | 1.51625800  | -2.38154900 | -1.94049600 |
| H  | 2.16077200  | 1.81287900  | 1.34330200  |
| H  | 4.62757500  | 1.44430700  | 1.26228700  |
| H  | 5.51965300  | -0.38524500 | -0.21422000 |
| H  | 3.90080800  | -1.74595600 | -1.55700000 |
| H  | -3.27406200 | 1.63042200  | 0.60171700  |
| H  | -2.86370200 | 1.91624800  | -1.10867900 |
| H  | -4.28008200 | 0.91440700  | -0.68506200 |
| H  | -0.49849400 | 1.06062800  | 3.14117700  |
| H  | -0.16047500 | -0.54630300 | 3.83181100  |
| H  | 1.06588700  | 0.26929900  | 2.83267100  |
| H  | 0.99749500  | -0.80745200 | -2.56266800 |
| O  | -0.34297400 | 2.41098200  | 0.98665100  |
| O  | -0.28497500 | 1.30010600  | -1.52218600 |
| H  | -1.21244500 | 2.55064800  | 1.40569000  |
| O  | -0.11777620 | 3.19208366  | -1.47978373 |
| H  | -1.03251220 | 3.27921366  | -1.81373773 |
| H  | -0.28652926 | 3.06867624  | -0.17337663 |

Cartesian coordinates of product state associated with the process of O-O bond formation for Fe<sup>IV</sup>-oxyl radical (S=4) in complex (**1**):

|   |             |             |             |
|---|-------------|-------------|-------------|
| N | -2.38370200 | 0.01846900  | -0.49602400 |
| C | -2.91234400 | -0.67358100 | 0.72290300  |
| C | -2.21017000 | -0.14696800 | 1.96236500  |
| N | -0.71502500 | -0.09753700 | 1.80050700  |
| C | -0.04591700 | -1.43570500 | 1.93699700  |
| C | -0.21681600 | -2.36196800 | 0.72932400  |

|    |             |             |             |
|----|-------------|-------------|-------------|
| N  | -0.19776200 | -1.63901000 | -0.58425900 |
| C  | -2.33063500 | -0.87963800 | -1.67858100 |
| C  | -1.33265000 | -2.03418700 | -1.47683200 |
| C  | 1.11538800  | -1.75587900 | -1.25557800 |
| C  | 2.15063400  | -0.90257200 | -0.56578500 |
| N  | 1.70066100  | 0.22825700  | 0.01635600  |
| C  | 2.57552100  | 1.07923100  | 0.58632000  |
| C  | 3.94121700  | 0.82852500  | 0.60666300  |
| C  | 4.41361400  | -0.34547000 | 0.01893600  |
| C  | 3.50671400  | -1.22209900 | -0.57185800 |
| Fe | -0.37427600 | 0.58824200  | -0.11547300 |
| C  | -3.20086000 | 1.22057100  | -0.80094100 |
| C  | -0.17512700 | 0.78066100  | 2.87716200  |
| H  | -2.78101500 | -1.74745300 | 0.61238600  |
| H  | -3.98983900 | -0.49684600 | 0.80961700  |
| H  | -2.46448300 | -0.75139400 | 2.84048700  |
| H  | -2.53254600 | 0.87942300  | 2.15402400  |
| H  | -0.43144800 | -1.93253100 | 2.83499200  |
| H  | 1.01175500  | -1.22920900 | 2.10359300  |
| H  | -1.14782200 | -2.91956300 | 0.81092400  |
| H  | 0.58912500  | -3.10354000 | 0.75638700  |
| H  | -2.03170400 | -0.26050500 | -2.52618200 |
| H  | -3.33041800 | -1.27960600 | -1.88898300 |
| H  | -0.94819500 | -2.33168600 | -2.45489200 |
| H  | -1.83117200 | -2.91062200 | -1.05863900 |
| H  | 1.44951800  | -2.79906100 | -1.30550100 |
| H  | 2.15845500  | 1.97522800  | 1.03180400  |
| H  | 4.61187600  | 1.53792300  | 1.07830600  |
| H  | 5.47413400  | -0.57693000 | 0.02389400  |
| H  | 3.83562500  | -2.14528900 | -1.03706300 |
| H  | -3.24853800 | 1.86322100  | 0.08126000  |
| H  | -2.74552600 | 1.77020400  | -1.62554400 |
| H  | -4.21864700 | 0.92277400  | -1.08058700 |
| H  | -0.63519400 | 1.76604300  | 2.81321900  |
| H  | -0.39697700 | 0.33828700  | 3.85568200  |
| H  | 0.90564200  | 0.87693600  | 2.76862200  |
| H  | 1.00511700  | -1.39244800 | -2.28217200 |
| O  | -0.29868600 | 2.66420500  | 0.44296700  |
| O  | -0.20747600 | 1.07652800  | -1.85517600 |
| H  | -1.20434200 | 3.02304700  | 0.43136600  |
| O  | 0.73129400  | 2.18099100  | -2.02332800 |
| H  | 0.20101600  | 2.77997800  | -2.58432800 |
| H  | 0.12510600  | 2.99876300  | -0.37872000 |

Cartesian coordinates of reactant state associated with the process of the water rotation for Fe<sup>IV</sup>-oxyl radical (S=4) in complex (2):

|    |             |             |             |
|----|-------------|-------------|-------------|
| N  | -2.93062100 | -0.09075300 | -0.37243000 |
| C  | -3.37693300 | -1.00860000 | 0.74062300  |
| C  | -2.59847800 | -0.72736200 | 2.01060900  |
| N  | -1.12412400 | -0.59999900 | 1.76580100  |
| C  | -0.41515900 | -1.90524200 | 1.59794900  |
| C  | -0.67439200 | -2.52832700 | 0.23708500  |
| N  | -0.69442400 | -1.49145200 | -0.87162300 |
| C  | -2.96918000 | -0.78649700 | -1.70234700 |
| C  | -1.80618800 | -1.78116200 | -1.85912800 |
| C  | 0.63539900  | -1.41741600 | -1.55968500 |
| C  | 1.58864000  | -0.59843200 | -0.74244600 |
| N  | 1.02064000  | 0.37628400  | 0.00198400  |
| C  | 1.77379200  | 1.24454400  | 0.69809200  |
| C  | 3.16062400  | 1.16697100  | 0.68966600  |
| C  | 3.73393400  | 0.15055600  | -0.06172200 |
| C  | 2.96992100  | -0.75027100 | -0.78914200 |
| Fe | -0.98818300 | 0.42456000  | -0.10394600 |
| C  | -3.81504100 | 1.11229500  | -0.42341100 |
| C  | -0.53810200 | 0.08433000  | 2.95243900  |
| H  | -3.27639100 | -2.03856100 | 0.40849600  |
| H  | -4.44234500 | -0.83733000 | 0.91774000  |
| H  | -2.78799600 | -1.51227700 | 2.75103900  |
| H  | -2.92631500 | 0.22423600  | 2.43246800  |
| H  | -0.72336300 | -2.60328300 | 2.38482300  |
| H  | 0.64963600  | -1.70952400 | 1.73156200  |
| H  | -1.62395800 | -3.05484700 | 0.22690600  |
| H  | 0.09928100  | -3.26873300 | 0.01881600  |
| H  | -2.90789200 | -0.00947500 | -2.46272200 |
| H  | -3.93716300 | -1.28797600 | -1.80016600 |
| H  | -1.41041800 | -1.70307300 | -2.87123100 |
| H  | -2.13325800 | -2.81106900 | -1.71616800 |
| H  | 1.02269500  | -2.41983000 | -1.75895400 |
| H  | 1.24926400  | 2.00765200  | 1.25850800  |
| H  | 3.75693200  | 1.87342500  | 1.25130200  |
| H  | 3.42121700  | -1.53989400 | -1.37581100 |
| H  | -3.86535300 | 1.56410100  | 0.56681500  |
| H  | -3.41501200 | 1.82847400  | -1.14032600 |
| H  | -4.81485800 | 0.79292300  | -0.73475300 |
| H  | -0.98146500 | 1.07261000  | 3.06294200  |
| H  | -0.74324200 | -0.51185500 | 3.84915700  |
| H  | 0.54146800  | 0.17998000  | 2.83550900  |



|    |             |             |             |
|----|-------------|-------------|-------------|
| H  | 0.49505500  | -0.90821000 | -2.51736000 |
| O  | -1.23677400 | 1.89565800  | 0.81231800  |
| O  | -0.91027600 | 1.09842800  | -1.59883100 |
| H  | -1.31846200 | 2.67995900  | 0.18835700  |
| O  | -1.49490200 | 3.88676800  | -0.98479600 |
| H  | -1.37734000 | 3.26745800  | -1.72861700 |
| H  | -2.45609000 | 4.03911000  | -0.96687200 |
| Cl | 5.18833381  | 0.02540158  | -0.08736500 |

Cartesian coordinates of reactant state associated with the process of O-O bond formation for Fe<sup>IV</sup>-oxyl radical (S=2) in complex (2):

|    |             |             |             |
|----|-------------|-------------|-------------|
| N  | -2.28709900 | 0.05189400  | -0.18047800 |
| C  | -2.68536500 | -0.83059500 | 0.96515900  |
| C  | -1.72595200 | -0.65707700 | 2.11960000  |
| N  | -0.29954900 | -0.69142600 | 1.67851100  |
| C  | 0.23419000  | -2.05655400 | 1.44547900  |
| C  | -0.26164300 | -2.60672500 | 0.13198800  |
| N  | -0.25264900 | -1.53727700 | -0.92215600 |
| C  | -2.55037000 | -0.63985500 | -1.47665000 |
| C  | -1.45805800 | -1.67367000 | -1.81592100 |
| C  | 1.02650000  | -1.58187000 | -1.69374400 |
| C  | 2.10047500  | -0.84707300 | -0.94880700 |
| N  | 1.67135100  | 0.20883800  | -0.22896100 |
| C  | 2.54452100  | 1.00634900  | 0.39850400  |
| C  | 3.90673900  | 0.76712000  | 0.33542400  |
| C  | 4.36273600  | -0.33253600 | -0.38334000 |
| C  | 3.44763400  | -1.15329700 | -1.03477300 |
| Fe | -0.29784700 | 0.35765000  | -0.17881100 |
| C  | -3.06863100 | 1.31133400  | -0.13398200 |
| C  | 0.50761400  | -0.09327000 | 2.77144600  |
| H  | -2.73281600 | -1.85998700 | 0.62070100  |
| H  | -3.69711100 | -0.56268900 | 1.27942900  |
| H  | -1.89841100 | -1.42255700 | 2.88220900  |
| H  | -1.88374500 | 0.32339200  | 2.57498200  |
| H  | -0.05080700 | -2.72124700 | 2.26708900  |
| H  | 1.32245100  | -1.97946200 | 1.43814200  |
| H  | -1.26882200 | -3.00052600 | 0.22421500  |
| H  | 0.37253300  | -3.43321800 | -0.19473300 |
| H  | -2.57847700 | 0.13037900  | -2.24642700 |
| H  | -3.53650100 | -1.10902000 | -1.42730600 |
| H  | -1.13928800 | -1.51846700 | -2.84524400 |
| H  | -1.83107300 | -2.69445300 | -1.73570500 |
| H  | 1.30634800  | -2.61545200 | -1.90509300 |

|    |             |             |             |
|----|-------------|-------------|-------------|
| H  | 2.12401800  | 1.83308100  | 0.95730500  |
| H  | 4.58918800  | 1.43027600  | 0.85273700  |
| H  | 3.76540900  | -2.01781000 | -1.60592600 |
| H  | -3.01650900 | 1.73881400  | 0.86887200  |
| H  | -2.67069500 | 2.01841800  | -0.86264700 |
| H  | -4.11577700 | 1.09332100  | -0.36364000 |
| H  | 0.18980800  | 0.93215300  | 2.94766800  |
| H  | 0.36404300  | -0.68628500 | 3.68105800  |
| H  | 1.56509700  | -0.10420300 | 2.50751800  |
| H  | 0.86807400  | -1.06866500 | -2.64564300 |
| O  | -0.16902600 | 1.80608500  | 0.82145400  |
| O  | -0.34645700 | 0.86546000  | -1.66021100 |
| H  | -1.00914700 | 2.10624300  | 1.20648100  |
| O  | 0.58300400  | 3.63041800  | -0.83118200 |
| H  | 0.67023500  | 3.04743600  | -1.59663400 |
| H  | 0.20456100  | 3.04189000  | -0.15028200 |
| Cl | 5.96783790  | -1.01298694 | -0.62465806 |

Cartesian coordinates of transient state (TS1<sub>b</sub>) associated with the process of O-O bond formation for Fe<sup>IV</sup>-oxyl radical (S=2) in complex (2):

|    |             |             |             |
|----|-------------|-------------|-------------|
| N  | -2.39214500 | -0.03647800 | -0.39509500 |
| C  | -2.80363600 | -0.98477500 | 0.67399600  |
| C  | -2.04429600 | -0.67945600 | 1.94753800  |
| N  | -0.57624400 | -0.50833500 | 1.71718500  |
| C  | 0.16297800  | -1.79234500 | 1.54961700  |
| C  | -0.04485500 | -2.43652000 | 0.18821000  |
| N  | -0.13090600 | -1.43694100 | -0.92378300 |
| C  | -2.38652700 | -0.66982600 | -1.72838500 |
| C  | -1.27205600 | -1.72210100 | -1.84392300 |
| C  | 1.14672400  | -1.35690200 | -1.65916800 |
| C  | 2.18672600  | -0.67063300 | -0.81844600 |
| N  | 1.72904100  | 0.29367800  | -0.00615900 |
| C  | 2.58827800  | 1.01103100  | 0.72873100  |
| C  | 3.95305300  | 0.78358200  | 0.69894900  |
| C  | 4.41746900  | -0.23016200 | -0.13026000 |
| C  | 3.53639600  | -0.97447000 | -0.90398100 |
| Fe | -0.38571800 | 0.58188400  | -0.04471100 |
| C  | -3.25555900 | 1.16265000  | -0.38952100 |
| C  | -0.01970100 | 0.16042200  | 2.92068500  |
| H  | -2.64098800 | -2.00559600 | 0.33578000  |
| H  | -3.87763000 | -0.88555300 | 0.85879400  |
| H  | -2.20904200 | -1.46172700 | 2.69573500  |
| H  | -2.40307700 | 0.26609500  | 2.36071900  |

|    |             |             |             |
|----|-------------|-------------|-------------|
| H  | -0.14550800 | -2.48975200 | 2.33590600  |
| H  | 1.21887200  | -1.56889400 | 1.70631500  |
| H  | -0.94938900 | -3.03940200 | 0.19317600  |
| H  | 0.78348700  | -3.12616700 | -0.00054900 |
| H  | -2.23425300 | 0.12533500  | -2.45863500 |
| H  | -3.36028800 | -1.13258300 | -1.92397300 |
| H  | -0.91360400 | -1.73450900 | -2.87390600 |
| H  | -1.65683600 | -2.72058600 | -1.63339000 |
| H  | 1.48521800  | -2.34978800 | -1.97168100 |
| H  | 2.16421900  | 1.78643100  | 1.35563800  |
| H  | 4.62014400  | 1.37896800  | 1.30952100  |
| H  | 3.87681200  | -1.76918500 | -1.55713500 |
| H  | -3.24334400 | 1.61700400  | 0.60307400  |
| H  | -2.88000500 | 1.88358700  | -1.11737800 |
| H  | -4.28360100 | 0.88539900  | -0.64845700 |
| H  | -0.52566600 | 1.10977400  | 3.09071000  |
| H  | -0.16757500 | -0.48788600 | 3.79127200  |
| H  | 1.04739900  | 0.33760100  | 2.78872600  |
| H  | 0.98904900  | -0.75352100 | -2.55786800 |
| O  | -0.26931400 | 2.34118200  | 0.85381000  |
| O  | -0.30563900 | 1.30533500  | -1.51333100 |
| H  | -1.09485300 | 2.52698600  | 1.33056800  |
| O  | -0.14990300 | 3.20898900  | -1.47315100 |
| H  | -1.11001000 | 3.28931500  | -1.61862600 |
| H  | -0.18777104 | 3.01483186  | -0.17820000 |
| Cl | 6.11758600  | -0.57626900 | -0.19607800 |

Cartesian coordinates of product state associated with the process of O-O bond formation for Fe<sup>IV</sup>-oxyl radical (S=2) in complex (2):

|   |             |             |             |
|---|-------------|-------------|-------------|
| N | 3.00556400  | 0.12972400  | -0.33652300 |
| C | 3.49559400  | 0.27631100  | 1.07593000  |
| C | 2.70984300  | -0.64790200 | 1.98610400  |
| N | 1.23031300  | -0.56632700 | 1.73666200  |
| C | 0.57866400  | 0.64339300  | 2.33561900  |
| C | 0.82139400  | 1.90192100  | 1.51303600  |
| N | 0.80617000  | 1.62271600  | 0.01882300  |
| C | 3.06817100  | 1.42980300  | -1.07324500 |
| C | 1.92052400  | 2.37772900  | -0.67331500 |
| C | -0.53148800 | 1.96281100  | -0.56317300 |
| C | -1.51359900 | 0.85878200  | -0.28549300 |
| N | -0.98675300 | -0.38404500 | -0.19206700 |
| C | -1.79425600 | -1.44825000 | -0.03756100 |
| C | -3.17488200 | -1.32101400 | 0.04362600  |

|    |             |             |             |
|----|-------------|-------------|-------------|
| C  | -3.69681600 | -0.03677300 | -0.03585900 |
| C  | -2.88587600 | 1.07629400  | -0.20156100 |
| Fe | 1.01246600  | -0.34577400 | -0.30066600 |
| C  | 3.84299800  | -0.86980300 | -1.05450700 |
| C  | 0.61294800  | -1.76821500 | 2.36549400  |
| H  | 3.41022700  | 1.31694700  | 1.38012600  |
| H  | 4.55990500  | 0.02488000  | 1.12136000  |
| H  | 2.92254300  | -0.43164500 | 3.03927600  |
| H  | 2.99772700  | -1.68293200 | 1.78661700  |
| H  | 0.94189500  | 0.79542700  | 3.35838000  |
| H  | -0.48925600 | 0.42740600  | 2.39298400  |
| H  | 1.77810800  | 2.34945300  | 1.76723700  |
| H  | 0.05440400  | 2.64469300  | 1.74638600  |
| H  | 2.99202800  | 1.19002400  | -2.13287200 |
| H  | 4.04214700  | 1.90088700  | -0.90217200 |
| H  | 1.52189900  | 2.84983400  | -1.57113700 |
| H  | 2.26497100  | 3.17674500  | -0.01575300 |
| H  | -0.88954900 | 2.92529300  | -0.18814600 |
| H  | -1.31703200 | -2.41777000 | 0.02099600  |
| H  | -3.80639700 | -2.19001300 | 0.17010900  |
| H  | -3.29422000 | 2.07657600  | -0.26335300 |
| H  | 3.90181000  | -1.78980600 | -0.46910000 |
| H  | 3.40103000  | -1.08212100 | -2.02856800 |
| H  | 4.85630000  | -0.47485500 | -1.18998900 |
| H  | 1.02995700  | -2.67281800 | 1.92365300  |
| H  | 0.81933400  | -1.76353900 | 3.44224800  |
| H  | -0.46645600 | -1.75493100 | 2.21586300  |
| H  | -0.41830500 | 2.04121000  | -1.64743500 |
| O  | 1.01378900  | -2.33326500 | -0.57814600 |
| O  | 0.95979800  | -0.09214700 | -2.09892100 |
| H  | 1.87797400  | -2.76734300 | -0.46118500 |
| O  | 0.26304800  | -1.18202300 | -2.78485100 |
| H  | 0.87534000  | -1.34209400 | -3.52894900 |
| H  | 0.79922500  | -2.38428800 | -1.54304100 |
| Cl | -5.10251862 | 0.14241843  | 0.05519353  |

Cartesian coordinates of reactant state associated with the process of O-O bond formation for Fe<sup>IV</sup>-oxyl radical (S=4) in complex (2):

|   |             |             |             |
|---|-------------|-------------|-------------|
| N | -2.77019300 | -0.09227200 | -0.44489100 |
| C | -3.26879400 | -0.98568800 | 0.65123300  |
| C | -2.52638500 | -0.70637100 | 1.93824800  |
| N | -1.05250100 | -0.59549200 | 1.72712900  |
| C | -0.36162800 | -1.90887000 | 1.60585400  |

|    |             |             |             |
|----|-------------|-------------|-------------|
| C  | -0.61985100 | -2.56549500 | 0.26878100  |
| N  | -0.60926900 | -1.56233300 | -0.85832000 |
| C  | -2.81350800 | -0.79209500 | -1.76117700 |
| C  | -1.70868900 | -1.84872900 | -1.84990700 |
| C  | 0.72388700  | -1.55546200 | -1.52831700 |
| C  | 1.68515300  | -0.78383500 | -0.68248900 |
| N  | 1.14042100  | 0.23334300  | 0.00513400  |
| C  | 1.89850400  | 1.06880300  | 0.72499800  |
| C  | 3.27144000  | 0.90532800  | 0.80237200  |
| C  | 3.81905200  | -0.15938200 | 0.11072200  |
| C  | 3.05060200  | -1.02558700 | -0.64528100 |
| Fe | -0.82554600 | 0.34815900  | -0.14848700 |
| C  | -3.60729300 | 1.13414200  | -0.51084700 |
| C  | -0.47988300 | 0.06374000  | 2.92824800  |
| H  | -3.17920000 | -2.02055100 | 0.33290800  |
| H  | -4.33468500 | -0.79261000 | 0.79323000  |
| H  | -2.74271100 | -1.48181900 | 2.67938500  |
| H  | -2.85755600 | 0.25389700  | 2.33928100  |
| H  | -0.68820800 | -2.57587700 | 2.41031200  |
| H  | 0.70523900  | -1.72487400 | 1.74386300  |
| H  | -1.57624900 | -3.07881500 | 0.26985500  |
| H  | 0.14313500  | -3.32338400 | 0.08052000  |
| H  | -2.68415000 | -0.03167300 | -2.53029400 |
| H  | -3.80292600 | -1.24216600 | -1.88361400 |
| H  | -1.29073000 | -1.84470600 | -2.85542700 |
| H  | -2.09077800 | -2.85067900 | -1.65885100 |
| H  | 1.06155500  | -2.57555800 | -1.72155000 |
| H  | 1.39076300  | 1.87614500  | 1.23738400  |
| H  | 3.87520500  | 1.58495800  | 1.38827300  |
| H  | 3.48247000  | -1.85707400 | -1.18693600 |
| H  | -3.66612200 | 1.58336700  | 0.48014100  |
| H  | -3.16695200 | 1.84392800  | -1.20992300 |
| H  | -4.60800100 | 0.84807200  | -0.84779600 |
| H  | -0.98441500 | 1.00756400  | 3.14028800  |
| H  | -0.62163700 | -0.59043900 | 3.79469100  |
| H  | 0.58645200  | 0.24080600  | 2.79190600  |
| H  | 0.62775000  | -1.03457400 | -2.48448900 |
| O  | -1.01002400 | 1.94120300  | 0.57753600  |
| O  | -0.67605500 | 0.94779000  | -1.65402600 |
| H  | -1.18145100 | 1.93805400  | 1.53170200  |
| O  | -1.51033400 | 3.77944100  | -1.51055000 |
| H  | -1.30083000 | 3.08724100  | -2.15259700 |
| H  | -1.41249800 | 3.30211500  | -0.66713000 |
| Cl | 5.22151577  | -0.37105670 | 0.17919967  |

Cartesian coordinates of transient state (TS2b) associated with the process of O-O bond formation for Fe<sup>IV</sup>-oxyl radical (S=4) in complex (2):

|    |             |             |             |
|----|-------------|-------------|-------------|
| N  | -2.38922700 | -0.03406400 | -0.39473200 |
| C  | -2.80189000 | -0.98164900 | 0.67445000  |
| C  | -2.04070300 | -0.67850200 | 1.94740400  |
| N  | -0.57244000 | -0.51121000 | 1.71646300  |
| C  | 0.16342900  | -1.79679100 | 1.54805900  |
| C  | -0.04793500 | -2.44102800 | 0.18703500  |
| N  | -0.13383200 | -1.44244300 | -0.92462200 |
| C  | -2.38585100 | -0.66746100 | -1.72806700 |
| C  | -1.27585800 | -1.72448100 | -1.84306700 |
| C  | 1.14485600  | -1.36035400 | -1.65865600 |
| C  | 2.18483700  | -0.67355400 | -0.81805100 |
| N  | 1.72395600  | 0.29199700  | -0.00685900 |
| C  | 2.57967700  | 1.01421100  | 0.73031700  |
| C  | 3.94480000  | 0.78394400  | 0.69600900  |
| C  | 4.42975500  | -0.22686200 | -0.12773700 |
| C  | 3.53804300  | -0.96720200 | -0.89574600 |
| Fe | -0.37881400 | 0.58018700  | -0.04507600 |
| C  | -3.25158900 | 1.16560500  | -0.38944800 |
| C  | -0.01392500 | 0.15612000  | 2.91964500  |
| H  | -2.64191100 | -2.00284600 | 0.33611700  |
| H  | -3.87549800 | -0.88011100 | 0.86046500  |
| H  | -2.20725900 | -1.46033800 | 2.69572900  |
| H  | -2.39685100 | 0.26799500  | 2.36077400  |
| H  | -0.14500400 | -2.49310400 | 2.33541500  |
| H  | 1.22001100  | -1.57500400 | 1.70199300  |
| H  | -0.95350200 | -3.04251300 | 0.19414400  |
| H  | 0.77906900  | -3.13223500 | -0.00234100 |
| H  | -2.22978800 | 0.12730200  | -2.45802300 |
| H  | -3.36167700 | -1.12578600 | -1.92414400 |
| H  | -0.91841700 | -1.73993100 | -2.87343900 |
| H  | -1.66540600 | -2.72094200 | -1.63127400 |
| H  | 1.48400800  | -2.35358600 | -1.97022300 |
| H  | 2.14621700  | 1.78749500  | 1.35370800  |
| H  | 4.60630100  | 1.38502400  | 1.30821900  |
| H  | 3.87809900  | -1.76251600 | -1.54938000 |
| H  | -3.24148300 | 1.61867000  | 0.60375400  |
| H  | -2.87397500 | 1.88717500  | -1.11564400 |
| H  | -4.27939600 | 0.88968200  | -0.65093500 |
| H  | -0.51646300 | 1.10755600  | 3.08845800  |
| H  | -0.16440800 | -0.49086100 | 3.79081100  |

|    |             |             |             |
|----|-------------|-------------|-------------|
| H  | 1.05376800  | 0.32925200  | 2.78729000  |
| H  | 0.98398000  | -0.76002900 | -2.55887900 |
| O  | -0.27657600 | 2.34398700  | 0.85555200  |
| O  | -0.29906800 | 1.30475500  | -1.51317700 |
| H  | -1.10583100 | 2.52662200  | 1.32676000  |
| O  | -0.17552400 | 3.19439100  | -1.36038500 |
| H  | -1.08049200 | 3.30462000  | -1.70391000 |
| H  | -0.28187200 | 2.91499600  | -0.07157300 |
| Cl | 6.12696463  | -0.56388836 | -0.19663452 |

Cartesian coordinates of product state associated with the process of O-O bond formation for Fe<sup>IV</sup>-oxyl radical (S=4) in complex (2):

|    |             |             |             |
|----|-------------|-------------|-------------|
| N  | 3.00556400  | 0.12972400  | -0.33652300 |
| C  | 3.49559400  | 0.27631100  | 1.07593000  |
| C  | 2.70984300  | -0.64790200 | 1.98610400  |
| N  | 1.23031300  | -0.56632700 | 1.73666200  |
| C  | 0.57866400  | 0.64339300  | 2.33561900  |
| C  | 0.82139400  | 1.90192100  | 1.51303600  |
| N  | 0.80617000  | 1.62271600  | 0.01882300  |
| C  | 3.06817100  | 1.42980300  | -1.07324500 |
| C  | 1.92052400  | 2.37772900  | -0.67331500 |
| C  | -0.53148800 | 1.96281100  | -0.56317300 |
| C  | -1.51359900 | 0.85878200  | -0.28549300 |
| N  | -0.98675300 | -0.38404500 | -0.19206700 |
| C  | -1.79425600 | -1.44825000 | -0.03756100 |
| C  | -3.17488200 | -1.32101400 | 0.04362600  |
| C  | -3.69681600 | -0.03677300 | -0.03585900 |
| C  | -2.88587600 | 1.07629400  | -0.20156100 |
| Fe | 1.01246600  | -0.34577400 | -0.30066600 |
| C  | 3.84299800  | -0.86980300 | -1.05450700 |
| C  | 0.61294800  | -1.76821500 | 2.36549400  |
| H  | 3.41022700  | 1.31694700  | 1.38012600  |
| H  | 4.55990500  | 0.02488000  | 1.12136000  |
| H  | 2.92254300  | -0.43164500 | 3.03927600  |
| H  | 2.99772700  | -1.68293200 | 1.78661700  |
| H  | 0.94189500  | 0.79542700  | 3.35838000  |
| H  | -0.48925600 | 0.42740600  | 2.39298400  |
| H  | 1.77810800  | 2.34945300  | 1.76723700  |
| H  | 0.05440400  | 2.64469300  | 1.74638600  |
| H  | 2.99202800  | 1.19002400  | -2.13287200 |
| H  | 4.04214700  | 1.90088700  | -0.90217200 |
| H  | 1.52189900  | 2.84983400  | -1.57113700 |
| H  | 2.26497100  | 3.17674500  | -0.01575300 |

|    |             |             |             |
|----|-------------|-------------|-------------|
| H  | -0.88954900 | 2.92529300  | -0.18814600 |
| H  | -1.31703200 | -2.41777000 | 0.02099600  |
| H  | -3.80639700 | -2.19001300 | 0.17010900  |
| H  | -3.29422000 | 2.07657600  | -0.26335300 |
| H  | 3.90181000  | -1.78980600 | -0.46910000 |
| H  | 3.40103000  | -1.08212100 | -2.02856800 |
| H  | 4.85630000  | -0.47485500 | -1.18998900 |
| H  | 1.02995700  | -2.67281800 | 1.92365300  |
| H  | 0.81933400  | -1.76353900 | 3.44224800  |
| H  | -0.46645600 | -1.75493100 | 2.21586300  |
| H  | -0.41830500 | 2.04121000  | -1.64743500 |
| O  | 1.01378900  | -2.33326500 | -0.57814600 |
| O  | 0.95979800  | -0.09214700 | -2.09892100 |
| H  | 1.87797400  | -2.76734300 | -0.46118500 |
| O  | 0.26304800  | -1.18202300 | -2.78485100 |
| H  | 0.87534000  | -1.34209400 | -3.52894900 |
| H  | 0.79922500  | -2.38428800 | -1.54304100 |
| Cl | -5.10251862 | 0.14241843  | 0.05519353  |

Cartesian coordinates of reactant state associated with the process of the water rotation for Fe<sup>IV</sup>-oxyl radical (S=4) in complex **(3)**:

|    |             |             |             |
|----|-------------|-------------|-------------|
| N  | -2.26653800 | -0.11722300 | -0.26197200 |
| C  | -2.61330700 | -1.14288400 | 0.77295100  |
| C  | -1.76887500 | -0.94114900 | 2.01067500  |
| N  | -0.32856000 | -0.73637500 | 1.68538300  |
| C  | 0.40835900  | -1.98806700 | 1.37428200  |
| C  | 0.08653500  | -2.51002100 | -0.01235000 |
| N  | -0.06052800 | -1.39028700 | -1.01029500 |
| C  | -2.38250300 | -0.68566600 | -1.63435800 |
| C  | -1.21869000 | -1.63638900 | -1.93774800 |
| C  | 1.20907700  | -1.20516500 | -1.76861600 |
| C  | 2.18858400  | -0.46681300 | -0.91162500 |
| N  | 1.63108500  | 0.42749500  | -0.07071700 |
| C  | 2.39736900  | 1.22449900  | 0.68780900  |
| C  | 3.77791700  | 1.13693400  | 0.64543100  |
| C  | 4.36730300  | 0.20144800  | -0.19859000 |
| C  | 3.56254400  | -0.61142500 | -0.98948900 |
| Fe | -0.34571600 | 0.42456700  | -0.07476000 |
| C  | -3.17787400 | 1.04891900  | -0.14047600 |
| C  | 0.30520300  | -0.13138700 | 2.88067600  |
| H  | -2.49227700 | -2.13477300 | 0.34435000  |
| H  | -3.67123500 | -1.03778000 | 1.02591100  |
| H  | -1.88341800 | -1.78929900 | 2.69373800  |



|   |             |             |             |
|---|-------------|-------------|-------------|
| H | -2.10196100 | -0.03959100 | 2.52861700  |
| H | 0.17686600  | -2.75520000 | 2.12051300  |
| H | 1.47256900  | -1.76083200 | 1.45395700  |
| H | -0.83007100 | -3.09269800 | -0.00216700 |
| H | 0.88057700  | -3.18295800 | -0.34347600 |
| H | -2.37688700 | 0.15545700  | -2.32664700 |
| H | -3.34579700 | -1.19648800 | -1.72100800 |
| H | -0.89281600 | -1.47794100 | -2.96481500 |
| H | -1.51800700 | -2.68039700 | -1.85014000 |
| H | 1.59834500  | -2.16674000 | -2.11009300 |
| H | 1.87858300  | 1.92934300  | 1.32576700  |
| H | 4.37322400  | 1.79109600  | 1.27043900  |
| H | -3.17108700 | 1.40695500  | 0.88834000  |
| H | -2.84226300 | 1.84131300  | -0.80898900 |
| H | -4.18822800 | 0.73288800  | -0.41657700 |
| H | -0.15887300 | 0.82968200  | 3.09541500  |
| H | 0.17335000  | -0.80337000 | 3.73578400  |
| H | 1.37218800  | 0.01119000  | 2.70907000  |
| H | 0.99675100  | -0.58957600 | -2.64639100 |
| O | -0.59416600 | 1.79298400  | 0.96545900  |
| O | -0.37238000 | 1.20724300  | -1.50062200 |
| H | -0.73853700 | 2.61656100  | 0.42317300  |
| O | -1.02170700 | 3.89724700  | -0.66666700 |
| H | -0.95085300 | 3.33231900  | -1.45245400 |
| H | -1.97459600 | 4.04426000  | -0.57659000 |
| O | 6.91430050  | 0.47579515  | 0.04724544  |
| O | 5.81343642  | -0.88170996 | -1.40492680 |
| C | 8.18814580  | -0.03633370 | -0.42091208 |
| C | 9.27818928  | 0.67181206  | 0.35990964  |
| C | 5.82511592  | -0.04207721 | -0.53744781 |
| H | 8.20603336  | -1.11992562 | -0.26706631 |
| H | 8.26362767  | 0.14787369  | -1.49726205 |
| H | 10.26017215 | 0.31160553  | 0.03466621  |
| H | 9.23646474  | 1.75350818  | 0.19729464  |
| H | 9.17861218  | 0.48002018  | 1.43301323  |
| H | 4.00370440  | -1.34523650 | -1.65510032 |

Cartesian coordinates of reactant state associated with the process of O-O bond formation for Fe<sup>IV</sup>-oxyl radical (S=2) in complex (3):

|   |            |             |             |
|---|------------|-------------|-------------|
| N | 1.62976907 | 0.11163309  | -0.10326638 |
| C | 1.16680507 | -0.78071391 | 1.00903562  |
| C | 1.98077407 | -0.51200991 | 2.25199362  |
| N | 3.44565107 | -0.44682291 | 1.96068662  |

|    |             |             |             |
|----|-------------|-------------|-------------|
| C  | 4.09213307  | -1.77767091 | 1.80134262  |
| C  | 3.78481907  | -2.37450791 | 0.44793262  |
| N  | 3.84077307  | -1.32230891 | -0.62829338 |
| C  | 1.55497707  | -0.60354391 | -1.41388638 |
| C  | 2.75369807  | -1.54838691 | -1.64193538 |
| C  | 5.19601507  | -1.28791591 | -1.24863438 |
| C  | 6.12407507  | -0.46502691 | -0.40526938 |
| N  | 5.55069807  | 0.54220109  | 0.28060262  |
| C  | 6.28863107  | 1.41497709  | 0.97487862  |
| C  | 7.66771907  | 1.30568709  | 1.03408962  |
| C  | 8.24256307  | 0.24804809  | 0.35299362  |
| C  | 7.49584707  | -0.65583891 | -0.38030938 |
| Fe | 3.58198007  | 0.53653709  | 0.12794462  |
| C  | 0.77321407  | 1.32126609  | -0.16611038 |
| C  | 4.08440107  | 0.22487209  | 3.12136862  |
| H  | 1.23105807  | -1.81644291 | 0.68638662  |
| H  | 0.11091507  | -0.58040391 | 1.20683962  |
| H  | 1.78812207  | -1.27135491 | 3.01571862  |
| H  | 1.70458607  | 0.46356209  | 2.65795762  |
| H  | 3.76165707  | -2.45359991 | 2.59618162  |
| H  | 5.16739007  | -1.63021891 | 1.91629662  |
| H  | 2.80087907  | -2.83229291 | 0.43614762  |
| H  | 4.50318907  | -3.16260991 | 0.21407362  |
| H  | 1.54186507  | 0.15989109  | -2.19002838 |
| H  | 0.60773207  | -1.14742491 | -1.45622338 |
| H  | 3.16289607  | -1.35866791 | -2.63312738 |
| H  | 2.45590307  | -2.59619591 | -1.60344038 |
| H  | 5.58011507  | -2.29770291 | -1.40606738 |
| H  | 5.75103707  | 2.20211409  | 1.48854362  |
| H  | 8.25574307  | 2.01448909  | 1.60116062  |
| H  | 7.95169207  | -1.47900991 | -0.91501738 |
| H  | 0.65578507  | 1.74380309  | 0.83327862  |
| H  | 1.22480607  | 2.05535909  | -0.83432038 |
| H  | -0.21490193 | 1.03855409  | -0.54117338 |
| H  | 3.68939707  | 1.23358609  | 3.22399562  |
| H  | 3.86771607  | -0.35327291 | 4.02580162  |
| H  | 5.16456907  | 0.26839509  | 2.98541062  |
| H  | 5.11879407  | -0.79567791 | -2.22181338 |
| O  | 3.48137707  | 2.11630509  | 0.99835762  |
| O  | 3.65377307  | 1.11457209  | -1.43726838 |
| H  | 2.59290607  | 2.31937909  | 1.32639962  |
| O  | 3.87823707  | 3.36027509  | -1.33999938 |
| H  | 2.99648107  | 3.42278509  | -1.73587238 |
| H  | 3.70216107  | 3.13348109  | -0.39573838 |

|   |             |             |             |
|---|-------------|-------------|-------------|
| O | 10.64612109 | 1.02826538  | 1.06778446  |
| O | 9.98260719  | -0.73773617 | -0.15745386 |
| C | 12.03088349 | 0.62782768  | 0.91701105  |
| C | 12.87382646 | 1.64887786  | 1.64146451  |
| C | 9.73742345  | 0.26267487  | 0.48804748  |
| H | 12.14310967 | -0.37331260 | 1.34058801  |
| H | 12.26025916 | 0.58889568  | -0.15071943 |
| H | 13.92790374 | 1.37145006  | 1.54725018  |
| H | 12.73968997 | 2.64519303  | 1.21007524  |
| H | 12.62010783 | 1.68371693  | 2.70500857  |

Cartesian coordinates of transient state (TS<sub>2</sub>) associated with the process of O-O bond formation for Fe<sup>IV</sup>-oxyl radical (S=2) in complex (3):

|    |             |             |             |
|----|-------------|-------------|-------------|
| N  | -2.93011900 | -0.09846900 | -0.36321900 |
| C  | -3.36850500 | -1.01526600 | 0.74452900  |
| C  | -2.58165400 | -0.72786600 | 2.01139000  |
| N  | -1.11363700 | -0.59280200 | 1.76062800  |
| C  | -0.41093900 | -1.89332500 | 1.58971200  |
| C  | -0.67625100 | -2.51400200 | 0.22864300  |
| N  | -0.70369900 | -1.47892400 | -0.87236300 |
| C  | -2.97237100 | -0.78238500 | -1.69298100 |
| C  | -1.80971000 | -1.76940100 | -1.85711800 |
| C  | 0.62250500  | -1.40192500 | -1.56103700 |
| C  | 1.58262200  | -0.59727600 | -0.73302700 |
| N  | 1.01341100  | 0.37021300  | 0.01331700  |
| C  | 1.76633400  | 1.23483000  | 0.71255000  |
| C  | 3.15180900  | 1.15474700  | 0.70863500  |
| C  | 3.72369600  | 0.14249700  | -0.04419100 |
| C  | 2.96080300  | -0.75160100 | -0.77757900 |
| Fe | -0.98097700 | 0.40856600  | -0.09331700 |
| C  | -3.84158000 | 1.08366800  | -0.42578500 |
| C  | -0.51820900 | 0.09167600  | 2.94151900  |
| H  | -3.25857800 | -2.04477300 | 0.41129100  |
| H  | -4.43558800 | -0.85869000 | 0.92837500  |
| H  | -2.76760300 | -1.51012200 | 2.75618600  |
| H  | -2.91198500 | 0.22085300  | 2.43981800  |
| H  | -0.70849100 | -2.59468300 | 2.37838700  |
| H  | 0.65457800  | -1.69555900 | 1.71595400  |
| H  | -1.62523100 | -3.04317900 | 0.22253100  |
| H  | 0.09567300  | -3.25514700 | 0.00439600  |
| H  | -2.91088100 | 0.00020700  | -2.44888600 |
| H  | -3.93819100 | -1.28762200 | -1.79977100 |
| H  | -1.41728000 | -1.68356000 | -2.87002500 |

|   |             |             |             |
|---|-------------|-------------|-------------|
| H | -2.13304700 | -2.80268400 | -1.72457000 |
| H | 1.00639200  | -2.40369100 | -1.77452500 |
| H | 1.23810600  | 1.99440300  | 1.27869500  |
| H | 3.75766000  | 1.85265500  | 1.27365500  |
| H | 3.42565000  | -1.53373100 | -1.36668300 |
| H | -3.93871700 | 1.53088500  | 0.56397600  |
| H | -3.45359100 | 1.81519400  | -1.13591100 |
| H | -4.83328900 | 0.75463300  | -0.75034700 |
| H | -0.95141300 | 1.08398300  | 3.05076500  |
| H | -0.70929200 | -0.49524200 | 3.84727400  |
| H | 0.55970900  | 0.18450800  | 2.80815300  |
| H | 0.48139200  | -0.88021300 | -2.51236400 |
| O | -1.23237200 | 2.10181500  | 0.89076300  |
| O | -0.90258600 | 1.20388700  | -1.64385100 |
| H | -2.17789500 | 2.30591700  | 1.04282000  |
| O | -1.12793730 | 2.99587045  | -1.49986691 |
| H | -2.09820130 | 3.02786145  | -1.56504991 |
| H | -1.16454200 | 2.84341500  | -0.19951100 |
| O | 5.93334500  | 1.15610900  | 0.77405000  |
| O | 5.66794900  | -0.65323100 | -0.53593900 |
| C | 7.37240900  | 0.98810800  | 0.73508100  |
| C | 7.97620100  | 2.10740300  | 1.54782000  |
| C | 5.21155900  | 0.27363500  | 0.10455800  |
| H | 7.61100200  | 0.00487700  | 1.14814700  |
| H | 7.69135500  | 1.02077500  | -0.30961200 |
| H | 9.06548400  | 2.00587700  | 1.53913800  |
| H | 7.71748500  | 3.08261000  | 1.12500700  |
| H | 7.63432500  | 2.06692700  | 2.58618200  |

Cartesian coordinates of product state associated with the process of O-O bond formation for Fe<sup>IV</sup>-oxyl radical (S=2) in complex (3):

|   |             |             |             |
|---|-------------|-------------|-------------|
| N | 2.36496700  | -0.03683300 | -0.43104000 |
| C | 2.86247400  | 0.63304000  | 0.80309900  |
| C | 2.11072300  | 0.10892400  | 2.00913400  |
| N | 0.63300300  | 0.07450700  | 1.78801800  |
| C | -0.02504500 | 1.40647100  | 1.92662400  |
| C | 0.21102400  | 2.34626500  | 0.74714000  |
| N | 0.22644500  | 1.63830300  | -0.56196200 |
| C | 2.37489000  | 0.87551700  | -1.59565700 |
| C | 1.37627000  | 2.02983200  | -1.41884200 |
| C | -1.06591100 | 1.74998500  | -1.25549400 |
| C | -2.10166900 | 0.89323400  | -0.57738400 |
| N | -1.65454000 | -0.25280100 | -0.03497400 |

|    |             |             |             |
|----|-------------|-------------|-------------|
| C  | -2.52231800 | -1.10982500 | 0.52365800  |
| C  | -3.87978200 | -0.84644700 | 0.57933400  |
| C  | -4.34905900 | 0.34666800  | 0.03845400  |
| C  | -3.44825500 | 1.22721700  | -0.54781800 |
| Fe | 0.38156300  | -0.57634800 | -0.13699100 |
| C  | 3.17363700  | -1.24040500 | -0.72177000 |
| C  | 0.05104200  | -0.81603600 | 2.82039200  |
| H  | 2.75340200  | 1.70948800  | 0.69635200  |
| H  | 3.93254200  | 0.43859700  | 0.92422900  |
| H  | 2.34000000  | 0.70326100  | 2.90007400  |
| H  | 2.41683500  | -0.92253100 | 2.20147900  |
| H  | 0.32688000  | 1.88153900  | 2.84892300  |
| H  | -1.09263900 | 1.21381900  | 2.04229300  |
| H  | 1.15054700  | 2.87983500  | 0.87449000  |
| H  | -0.57807300 | 3.10540300  | 0.75336000  |
| H  | 2.11236100  | 0.27517400  | -2.46786300 |
| H  | 3.38552400  | 1.27133200  | -1.74778600 |
| H  | 1.01986500  | 2.33130800  | -2.40565800 |
| H  | 1.86708100  | 2.90336900  | -0.98665800 |
| H  | -1.40425600 | 2.79039800  | -1.31538900 |
| H  | -2.10438400 | -2.02226900 | 0.93353500  |
| H  | -4.54853500 | -1.56127100 | 1.04348700  |
| H  | -3.77599100 | 2.16564100  | -0.98074700 |
| H  | 3.19347900  | -1.88741600 | 0.15797700  |
| H  | 2.73028200  | -1.78143700 | -1.55854400 |
| H  | 4.19968900  | -0.95165300 | -0.97561600 |
| H  | 0.49176700  | -1.80889200 | 2.74028800  |
| H  | 0.25442800  | -0.40406700 | 3.81527400  |
| H  | -1.02803100 | -0.88869800 | 2.68232200  |
| H  | -0.94063100 | 1.37599200  | -2.27583600 |
| O  | 0.27285200  | -2.67067900 | 0.38322700  |
| O  | 0.26971300  | -1.00416200 | -1.88937400 |
| H  | 1.16449800  | -3.05190500 | 0.37998000  |
| O  | -0.73981600 | -1.98779000 | -2.12361300 |
| H  | -0.24315600 | -2.64512600 | -2.63855700 |
| H  | -0.15760600 | -3.01195000 | -0.42254200 |
| O  | -6.65216404 | -0.08836062 | 0.54892287  |
| O  | -6.09738398 | 1.80722790  | -0.57468291 |
| C  | -8.05982037 | 0.24420168  | 0.43921325  |
| C  | -8.84315565 | -0.86117599 | 1.12029539  |
| C  | -5.79974092 | 0.78612196  | -0.00337712 |
| H  | -8.22541179 | 1.21889450  | 0.90901410  |
| H  | -8.31407097 | 0.33884909  | -0.62123867 |
| H  | -9.91558198 | -0.64674408 | 1.05911008  |

|   |             |             |            |
|---|-------------|-------------|------------|
| H | -8.65656138 | -1.82666943 | 0.63940595 |
| H | -8.56750399 | -0.94267584 | 2.17652677 |

Cartesian coordinates of reactant state associated with the process of O-O bond formation for Fe<sup>IV</sup>-oxyl radical (S=4) in complex (3):

|    |             |             |             |
|----|-------------|-------------|-------------|
| N  | -2.27829600 | 0.07117700  | -0.18466100 |
| C  | -2.69691200 | -0.85212800 | 0.93167300  |
| C  | -1.79970500 | -0.66360700 | 2.13724700  |
| N  | -0.34439900 | -0.64103000 | 1.76565300  |
| C  | 0.24097300  | -1.99360100 | 1.49283700  |
| C  | -0.18589000 | -2.55770500 | 0.14851000  |
| N  | -0.24200500 | -1.48981000 | -0.93204400 |
| C  | -2.50800800 | -0.56110400 | -1.52420200 |
| C  | -1.47261300 | -1.65930800 | -1.80552000 |
| C  | 1.01221100  | -1.51014800 | -1.76060400 |
| C  | 2.11826900  | -0.84121400 | -1.00315300 |
| N  | 1.71357900  | 0.15984700  | -0.18635300 |
| C  | 2.61210400  | 0.91232100  | 0.47552000  |
| C  | 3.97400300  | 0.67044300  | 0.35592600  |
| C  | 4.40664300  | -0.37281600 | -0.46193200 |
| C  | 3.46710200  | -1.13904300 | -1.15062200 |
| Fe | -0.26993600 | 0.40110200  | -0.10607700 |
| C  | -3.04626600 | 1.34872100  | -0.10258200 |
| C  | 0.39596300  | -0.08303000 | 2.93490900  |
| H  | -2.68870600 | -1.87566600 | 0.56693000  |
| H  | -3.73076000 | -0.61819800 | 1.20000300  |
| H  | -1.98444600 | -1.45035700 | 2.87653400  |
| H  | -2.01513500 | 0.30005600  | 2.60279600  |
| H  | -0.05052100 | -2.68745300 | 2.28934100  |
| H  | 1.32501100  | -1.88189300 | 1.53255200  |
| H  | -1.16129800 | -3.03020300 | 0.21413500  |
| H  | 0.51983400  | -3.33303600 | -0.15918000 |
| H  | -2.43475900 | 0.23452400  | -2.26411100 |
| H  | -3.52704100 | -0.96015100 | -1.54772600 |
| H  | -1.17157800 | -1.60581400 | -2.85110200 |
| H  | -1.87894000 | -2.65568400 | -1.63221500 |
| H  | 1.25936900  | -2.53560300 | -2.04573400 |
| H  | 2.21782600  | 1.70993400  | 1.09252800  |
| H  | 4.67345800  | 1.29354000  | 0.90121200  |
| H  | -2.97631200 | 1.74674600  | 0.90934400  |
| H  | -2.63914500 | 2.06988500  | -0.80974600 |
| H  | -4.09336800 | 1.13577900  | -0.34205400 |
| H  | -0.02239200 | 0.88048800  | 3.23275100  |

|   |             |             |             |
|---|-------------|-------------|-------------|
| H | 0.29227400  | -0.76780500 | 3.78406400  |
| H | 1.45307900  | 0.02993900  | 2.69625200  |
| H | 0.82151100  | -0.93681900 | -2.67151200 |
| O | -0.25916200 | 1.98322500  | 0.71119000  |
| O | -0.27927000 | 1.07574900  | -1.60032500 |
| H | -0.24959900 | 1.93292200  | 1.68449100  |
| O | -0.87879100 | 3.98423100  | -1.22453600 |
| H | -0.69723100 | 3.33850300  | -1.92728200 |
| H | -0.71768100 | 3.44722100  | -0.42322700 |
| O | 6.85701677  | -0.28900876 | -0.41666293 |
| O | 5.74231074  | -1.83803437 | -1.65014451 |
| C | 8.12674477  | -0.85134139 | -0.83583237 |
| C | 9.22432740  | -0.03669663 | -0.17931648 |
| C | 5.76213053  | -0.88856250 | -0.90465849 |
| H | 8.15744541  | -1.90395773 | -0.53714228 |
| H | 8.18079464  | -0.81415129 | -1.92846923 |
| H | 10.20347013 | -0.43109453 | -0.47181047 |
| H | 9.16965130  | 1.01269432  | -0.48597396 |
| H | 9.14619733  | -0.08200172 | 0.91159778  |
| H | 3.78450063  | -1.95508557 | -1.79164061 |

Cartesian coordinates of transient state (TS<sub>2</sub>) associated with the process of O-O bond formation for Fe<sup>IV</sup>-oxyl radical (S=4) in complex (3):

|    |             |             |             |
|----|-------------|-------------|-------------|
| N  | -2.93011900 | -0.09846900 | -0.36321900 |
| C  | -3.36850500 | -1.01526600 | 0.74452900  |
| C  | -2.58165400 | -0.72786600 | 2.01139000  |
| N  | -1.11363700 | -0.59280200 | 1.76062800  |
| C  | -0.41093900 | -1.89332500 | 1.58971200  |
| C  | -0.67625100 | -2.51400200 | 0.22864300  |
| N  | -0.70369900 | -1.47892400 | -0.87236300 |
| C  | -2.97237100 | -0.78238500 | -1.69298100 |
| C  | -1.80971000 | -1.76940100 | -1.85711800 |
| C  | 0.62250500  | -1.40192500 | -1.56103700 |
| C  | 1.58262200  | -0.59727600 | -0.73302700 |
| N  | 1.01341100  | 0.37021300  | 0.01331700  |
| C  | 1.76633400  | 1.23483000  | 0.71255000  |
| C  | 3.15180900  | 1.15474700  | 0.70863500  |
| C  | 3.72369600  | 0.14249700  | -0.04419100 |
| C  | 2.96080300  | -0.75160100 | -0.77757900 |
| Fe | -0.98097700 | 0.40856600  | -0.09331700 |
| C  | -3.84158000 | 1.08366800  | -0.42578500 |
| C  | -0.51820900 | 0.09167600  | 2.94151900  |
| H  | -3.25857800 | -2.04477300 | 0.41129100  |

|   |             |             |             |
|---|-------------|-------------|-------------|
| H | -4.43558800 | -0.85869000 | 0.92837500  |
| H | -2.76760300 | -1.51012200 | 2.75618600  |
| H | -2.91198500 | 0.22085300  | 2.43981800  |
| H | -0.70849100 | -2.59468300 | 2.37838700  |
| H | 0.65457800  | -1.69555900 | 1.71595400  |
| H | -1.62523100 | -3.04317900 | 0.22253100  |
| H | 0.09567300  | -3.25514700 | 0.00439600  |
| H | -2.91088100 | 0.00020700  | -2.44888600 |
| H | -3.93819100 | -1.28762200 | -1.79977100 |
| H | -1.41728000 | -1.68356000 | -2.87002500 |
| H | -2.13304700 | -2.80268400 | -1.72457000 |
| H | 1.00639200  | -2.40369100 | -1.77452500 |
| H | 1.23810600  | 1.99440300  | 1.27869500  |
| H | 3.75766000  | 1.85265500  | 1.27365500  |
| H | 3.42565000  | -1.53373100 | -1.36668300 |
| H | -3.93871700 | 1.53088500  | 0.56397600  |
| H | -3.45359100 | 1.81519400  | -1.13591100 |
| H | -4.83328900 | 0.75463300  | -0.75034700 |
| H | -0.95141300 | 1.08398300  | 3.05076500  |
| H | -0.70929200 | -0.49524200 | 3.84727400  |
| H | 0.55970900  | 0.18450800  | 2.80815300  |
| H | 0.48139200  | -0.88021300 | -2.51236400 |
| O | -1.23738200 | 2.06857300  | 0.87127200  |
| O | -0.90258600 | 1.20388700  | -1.64385100 |
| H | -2.18290500 | 2.27267500  | 1.02332900  |
| O | -1.01013195 | 2.99493073  | -1.48078006 |
| H | -1.98039595 | 3.02692273  | -1.54596306 |
| H | -1.15858143 | 2.71693348  | -0.16263790 |
| O | 6.02942144  | 0.98918672  | 0.63737286  |
| O | 5.62544898  | -0.75893710 | -0.71949503 |
| C | 7.45650301  | 0.76291773  | 0.52383690  |
| C | 8.14524365  | 1.82594850  | 1.34452627  |
| C | 5.23982373  | 0.16234595  | -0.02657368 |
| H | 7.67118841  | -0.24370182 | 0.89115321  |
| H | 7.72777237  | 0.82005817  | -0.53319914 |
| H | 9.22753241  | 1.67952444  | 1.28024184  |
| H | 7.90967593  | 2.82574607  | 0.96816757  |
| H | 7.85045864  | 1.76219458  | 2.39607281  |

Cartesian coordinates of product state associated with the process of O-O bond formation for Fe<sup>IV</sup>-oxyl radical (S=4) in complex (3):

|   |            |             |             |
|---|------------|-------------|-------------|
| N | 2.36496700 | -0.03683300 | -0.43104000 |
| C | 2.86247400 | 0.63304000  | 0.80309900  |



|    |             |             |             |
|----|-------------|-------------|-------------|
| C  | 2.11072300  | 0.10892400  | 2.00913400  |
| N  | 0.63300300  | 0.07450700  | 1.78801800  |
| C  | -0.02504500 | 1.40647100  | 1.92662400  |
| C  | 0.21102400  | 2.34626500  | 0.74714000  |
| N  | 0.22644500  | 1.63830300  | -0.56196200 |
| C  | 2.37489000  | 0.87551700  | -1.59565700 |
| C  | 1.37627000  | 2.02983200  | -1.41884200 |
| C  | -1.06591100 | 1.74998500  | -1.25549400 |
| C  | -2.10166900 | 0.89323400  | -0.57738400 |
| N  | -1.65454000 | -0.25280100 | -0.03497400 |
| C  | -2.52231800 | -1.10982500 | 0.52365800  |
| C  | -3.87978200 | -0.84644700 | 0.57933400  |
| C  | -4.34905900 | 0.34666800  | 0.03845400  |
| C  | -3.44825500 | 1.22721700  | -0.54781800 |
| Fe | 0.38156300  | -0.57634800 | -0.13699100 |
| C  | 3.17363700  | -1.24040500 | -0.72177000 |
| C  | 0.05104200  | -0.81603600 | 2.82039200  |
| H  | 2.75340200  | 1.70948800  | 0.69635200  |
| H  | 3.93254200  | 0.43859700  | 0.92422900  |
| H  | 2.34000000  | 0.70326100  | 2.90007400  |
| H  | 2.41683500  | -0.92253100 | 2.20147900  |
| H  | 0.32688000  | 1.88153900  | 2.84892300  |
| H  | -1.09263900 | 1.21381900  | 2.04229300  |
| H  | 1.15054700  | 2.87983500  | 0.87449000  |
| H  | -0.57807300 | 3.10540300  | 0.75336000  |
| H  | 2.11236100  | 0.27517400  | -2.46786300 |
| H  | 3.38552400  | 1.27133200  | -1.74778600 |
| H  | 1.01986500  | 2.33130800  | -2.40565800 |
| H  | 1.86708100  | 2.90336900  | -0.98665800 |
| H  | -1.40425600 | 2.79039800  | -1.31538900 |
| H  | -2.10438400 | -2.02226900 | 0.93353500  |
| H  | -4.54853500 | -1.56127100 | 1.04348700  |
| H  | 3.19347900  | -1.88741600 | 0.15797700  |
| H  | 2.73028200  | -1.78143700 | -1.55854400 |
| H  | 4.19968900  | -0.95165300 | -0.97561600 |
| H  | 0.49176700  | -1.80889200 | 2.74028800  |
| H  | 0.25442800  | -0.40406700 | 3.81527400  |
| H  | -1.02803100 | -0.88869800 | 2.68232200  |
| H  | -0.94063100 | 1.37599200  | -2.27583600 |
| O  | 0.27285200  | -2.67067900 | 0.38322700  |
| O  | 0.26971300  | -1.00416200 | -1.88937400 |
| H  | 1.16449800  | -3.05190500 | 0.37998000  |
| O  | -0.73981600 | -1.98779000 | -2.12361300 |
| H  | -0.24315600 | -2.64512600 | -2.63855700 |

|   |              |             |             |
|---|--------------|-------------|-------------|
| H | -0.15760600  | -3.01195000 | -0.42254200 |
| O | -6.86348473  | 0.50718122  | 0.26867647  |
| O | -5.53911198  | 2.08157475  | -0.69612843 |
| C | -8.03565718  | 1.32582496  | 0.02380023  |
| C | -9.23697166  | 0.57348288  | 0.56247613  |
| C | -5.69593011  | 1.01849596  | -0.14575527 |
| H | -7.89593380  | 2.29182242  | 0.51926540  |
| H | -8.11223547  | 1.51209105  | -1.05211822 |
| H | -10.14655844 | 1.16072722  | 0.39628673  |
| H | -9.35264025  | -0.39144645 | 0.05870851  |
| H | -9.13536807  | 0.39178287  | 1.63714474  |
| H | -3.79268775  | 2.16241502  | -0.97630974 |

Cartesian coordinates of reactant state associated with the process of the water rotation for Fe<sup>IV</sup>-oxyl radical (S=4) in complex (4):

|    |             |             |             |
|----|-------------|-------------|-------------|
| N  | -2.93062100 | -0.09075300 | -0.37243000 |
| C  | -3.37693300 | -1.00860000 | 0.74062300  |
| C  | -2.59847800 | -0.72736200 | 2.01060900  |
| N  | -1.12412400 | -0.59999900 | 1.76580100  |
| C  | -0.41515900 | -1.90524200 | 1.59794900  |
| C  | -0.67439200 | -2.52832700 | 0.23708500  |
| N  | -0.69442400 | -1.49145200 | -0.87162300 |
| C  | -2.96918000 | -0.78649700 | -1.70234700 |
| C  | -1.80618800 | -1.78116200 | -1.85912800 |
| C  | 0.63539900  | -1.41741600 | -1.55968500 |
| C  | 1.58864000  | -0.59843200 | -0.74244600 |
| N  | 1.02064000  | 0.37628400  | 0.00198400  |
| C  | 1.77379200  | 1.24454400  | 0.69809200  |
| C  | 3.16062400  | 1.16697100  | 0.68966600  |
| C  | 3.73393400  | 0.15055600  | -0.06172200 |
| C  | 2.96992100  | -0.75027100 | -0.78914200 |
| Fe | -0.98818300 | 0.42456000  | -0.10394600 |
| C  | -3.81504100 | 1.11229500  | -0.42341100 |
| C  | -0.53810200 | 0.08433000  | 2.95243900  |
| H  | -3.27639100 | -2.03856100 | 0.40849600  |
| H  | -4.44234500 | -0.83733000 | 0.91774000  |
| H  | -2.78799600 | -1.51227700 | 2.75103900  |
| H  | -2.92631500 | 0.22423600  | 2.43246800  |
| H  | -0.72336300 | -2.60328300 | 2.38482300  |
| H  | 0.64963600  | -1.70952400 | 1.73156200  |
| H  | -1.62395800 | -3.05484700 | 0.22690600  |
| H  | 0.09928100  | -3.26873300 | 0.01881600  |
| H  | -2.90789200 | -0.00947500 | -2.46272200 |

|   |             |             |             |
|---|-------------|-------------|-------------|
| H | -3.93716300 | -1.28797600 | -1.80016600 |
| H | -1.41041800 | -1.70307300 | -2.87123100 |
| H | -2.13325800 | -2.81106900 | -1.71616800 |
| H | 1.02269500  | -2.41983000 | -1.75895400 |
| H | 1.24926400  | 2.00765200  | 1.25850800  |
| H | 3.75693200  | 1.87342500  | 1.25130200  |
| H | 3.42121700  | -1.53989400 | -1.37581100 |
| H | -3.86535300 | 1.56410100  | 0.56681500  |
| H | -3.41501200 | 1.82847400  | -1.14032600 |
| H | -4.81485800 | 0.79292300  | -0.73475300 |
| H | -0.98146500 | 1.07261000  | 3.06294200  |
| H | -0.74324200 | -0.51185500 | 3.84915700  |
| H | 0.54146800  | 0.17998000  | 2.83550900  |
| H | 0.49505500  | -0.90821000 | -2.51736000 |
| O | -1.23677400 | 1.89565800  | 0.81231800  |
| O | -0.91027600 | 1.09842800  | -1.59883100 |
| H | -1.31846200 | 2.67995900  | 0.18835700  |
| O | -1.49490200 | 3.88676800  | -0.98479600 |
| H | -1.37734000 | 3.26745800  | -1.72861700 |
| H | -2.45609000 | 4.03911000  | -0.96687200 |
| N | 5.20562500  | 0.02185400  | -0.09285500 |
| O | 5.68527000  | -0.87509400 | -0.78234000 |
| O | 5.86236400  | 0.81969000  | 0.57158500  |

Cartesian coordinates of reactant state associated with the process of O-O bond formation for Fe<sup>IV</sup>-oxyl radical (S=2) in complex (4):

|    |             |             |             |
|----|-------------|-------------|-------------|
| N  | -2.85025800 | -0.12017500 | -0.41560900 |
| C  | -3.31949200 | -1.01826600 | 0.68896300  |
| C  | -2.55620200 | -0.72743400 | 1.96659000  |
| N  | -1.08647500 | -0.63591500 | 1.73582200  |
| C  | -0.40509300 | -1.94878100 | 1.60437300  |
| C  | -0.63951600 | -2.58980200 | 0.24418700  |
| N  | -0.65075800 | -1.57400800 | -0.86737500 |
| C  | -2.89269100 | -0.82339100 | -1.73141600 |
| C  | -1.75487100 | -1.85352600 | -1.85414900 |
| C  | 0.68017100  | -1.50731700 | -1.53976400 |
| C  | 1.63245200  | -0.70923800 | -0.69454100 |
| N  | 1.05645500  | 0.28995000  | 0.00620800  |
| C  | 1.80301000  | 1.15903500  | 0.70384500  |
| C  | 3.18401900  | 1.04465300  | 0.75571800  |
| C  | 3.76102400  | -0.00382400 | 0.06135200  |
| C  | 3.00354200  | -0.89872800 | -0.67828200 |
| Fe | -0.92004400 | 0.34919700  | -0.13580300 |

|   |             |             |             |
|---|-------------|-------------|-------------|
| C | -3.71177300 | 1.09635600  | -0.48070000 |
| C | -0.50036800 | 0.07274800  | 2.90425300  |
| H | -3.20743100 | -2.05321000 | 0.37133300  |
| H | -4.38945800 | -0.85686400 | 0.84971600  |
| H | -2.78282300 | -1.48355100 | 2.72740100  |
| H | -2.86872200 | 0.24134100  | 2.36242100  |
| H | -0.72545600 | -2.63544800 | 2.39720300  |
| H | 0.66130200  | -1.76858600 | 1.75263600  |
| H | -1.58530200 | -3.12646200 | 0.23126000  |
| H | 0.13589500  | -3.33732400 | 0.05260600  |
| H | -2.79280100 | -0.05840900 | -2.50102800 |
| H | -3.87179600 | -1.29931600 | -1.85203000 |
| H | -1.35162100 | -1.80895600 | -2.86607900 |
| H | -2.11262100 | -2.87356400 | -1.70507000 |
| H | 1.06026800  | -2.50926700 | -1.76050400 |
| H | 1.26718700  | 1.94641800  | 1.22113600  |
| H | 3.79191200  | 1.74268500  | 1.31937900  |
| H | 3.48212500  | -1.70462600 | -1.22371900 |
| H | -3.75953600 | 1.55392200  | 0.50724800  |
| H | -3.28679200 | 1.81435800  | -1.18228900 |
| H | -4.71632000 | 0.80574000  | -0.80309900 |
| H | -0.90267000 | 1.08358300  | 2.95372400  |
| H | -0.73710400 | -0.46758800 | 3.82719300  |
| H | 0.58374800  | 0.12310300  | 2.80072700  |
| H | 0.55443900  | -0.97267100 | -2.48593300 |
| O | -1.15246800 | 1.81667200  | 0.73219100  |
| O | -0.82658400 | 0.98234700  | -1.62205100 |
| H | -1.35282658 | 1.66660092  | 1.70165743  |
| O | -1.13665390 | 3.66098633  | -1.44648524 |
| H | -1.04173340 | 3.08302209  | -2.21563068 |
| H | -1.17542768 | 3.07817767  | -0.67740627 |
| N | 5.23643600  | -0.18026500 | 0.10485000  |
| O | 5.67845600  | -1.13384100 | -0.50331900 |
| O | 5.85557300  | 0.64238200  | 0.74561000  |

Cartesian coordinates of transient state (TS<sub>2</sub>) associated with the process of O-O bond formation for Fe<sup>IV</sup>-oxyl radical (S=2) in complex (4):

|   |             |             |             |
|---|-------------|-------------|-------------|
| N | -2.93011900 | -0.09846900 | -0.36321900 |
| C | -3.36850500 | -1.01526600 | 0.74452900  |
| C | -2.58165400 | -0.72786600 | 2.01139000  |
| N | -1.11363700 | -0.59280200 | 1.76062800  |
| C | -0.41093900 | -1.89332500 | 1.58971200  |
| C | -0.67625100 | -2.51400200 | 0.22864300  |

|    |             |             |             |
|----|-------------|-------------|-------------|
| N  | -0.70369900 | -1.47892400 | -0.87236300 |
| C  | -2.97237100 | -0.78238500 | -1.69298100 |
| C  | -1.80971000 | -1.76940100 | -1.85711800 |
| C  | 0.62250500  | -1.40192500 | -1.56103700 |
| C  | 1.58262200  | -0.59727600 | -0.73302700 |
| N  | 1.01341100  | 0.37021300  | 0.01331700  |
| C  | 1.76633400  | 1.23483000  | 0.71255000  |
| C  | 3.15180900  | 1.15474700  | 0.70863500  |
| C  | 3.72369600  | 0.14249700  | -0.04419100 |
| C  | 2.96080300  | -0.75160100 | -0.77757900 |
| Fe | -0.98097700 | 0.40856600  | -0.09331700 |
| C  | -3.84158000 | 1.08366800  | -0.42578500 |
| C  | -0.51820900 | 0.09167600  | 2.94151900  |
| H  | -3.25857800 | -2.04477300 | 0.41129100  |
| H  | -4.43558800 | -0.85869000 | 0.92837500  |
| H  | -2.76760300 | -1.51012200 | 2.75618600  |
| H  | -2.91198500 | 0.22085300  | 2.43981800  |
| H  | -0.70849100 | -2.59468300 | 2.37838700  |
| H  | 0.65457800  | -1.69555900 | 1.71595400  |
| H  | -1.62523100 | -3.04317900 | 0.22253100  |
| H  | 0.09567300  | -3.25514700 | 0.00439600  |
| H  | -2.91088100 | 0.00020700  | -2.44888600 |
| H  | -3.93819100 | -1.28762200 | -1.79977100 |
| H  | -1.41728000 | -1.68356000 | -2.87002500 |
| H  | -2.13304700 | -2.80268400 | -1.72457000 |
| H  | 1.00639200  | -2.40369100 | -1.77452500 |
| H  | 1.23810600  | 1.99440300  | 1.27869500  |
| H  | 3.75766000  | 1.85265500  | 1.27365500  |
| H  | 3.42565000  | -1.53373100 | -1.36668300 |
| H  | -3.93871700 | 1.53088500  | 0.56397600  |
| H  | -3.45359100 | 1.81519400  | -1.13591100 |
| H  | -4.83328900 | 0.75463300  | -0.75034700 |
| H  | -0.95141300 | 1.08398300  | 3.05076500  |
| H  | -0.70929200 | -0.49524200 | 3.84727400  |
| H  | 0.55970900  | 0.18450800  | 2.80815300  |
| H  | 0.48139200  | -0.88021300 | -2.51236400 |
| O  | -1.23237181 | 2.10181517  | 0.89076327  |
| O  | -0.90258600 | 1.20388700  | -1.64385100 |
| H  | -2.17789481 | 2.30591717  | 1.04282027  |
| O  | -1.12404060 | 2.95605588  | -1.46644534 |
| H  | -2.09430460 | 2.98804688  | -1.53162834 |
| H  | -1.16454200 | 2.84341500  | -0.19951100 |
| N  | 5.19228800  | 0.00878200  | -0.07249900 |
| O  | 5.64006900  | -0.89229500 | -0.76373900 |

O 5.82282000 0.80570000 0.60241400

Cartesian coordinates of product state associated with the process of O-O bond formation for Fe<sup>IV</sup>-oxyl radical (S=2) in complex (4):

|    |             |             |             |
|----|-------------|-------------|-------------|
| N  | 3.00556400  | 0.12972400  | -0.33652300 |
| C  | 3.49559400  | 0.27631100  | 1.07593000  |
| C  | 2.70984300  | -0.64790200 | 1.98610400  |
| N  | 1.23031300  | -0.56632700 | 1.73666200  |
| C  | 0.57866400  | 0.64339300  | 2.33561900  |
| C  | 0.82139400  | 1.90192100  | 1.51303600  |
| N  | 0.80617000  | 1.62271600  | 0.01882300  |
| C  | 3.06817100  | 1.42980300  | -1.07324500 |
| C  | 1.92052400  | 2.37772900  | -0.67331500 |
| C  | -0.53148800 | 1.96281100  | -0.56317300 |
| C  | -1.51359900 | 0.85878200  | -0.28549300 |
| N  | -0.98675300 | -0.38404500 | -0.19206700 |
| C  | -1.79425600 | -1.44825000 | -0.03756100 |
| C  | -3.17488200 | -1.32101400 | 0.04362600  |
| C  | -3.69681600 | -0.03677300 | -0.03585900 |
| C  | -2.88587600 | 1.07629400  | -0.20156100 |
| Fe | 1.01246600  | -0.34577400 | -0.30066600 |
| C  | 3.84299800  | -0.86980300 | -1.05450700 |
| C  | 0.61294800  | -1.76821500 | 2.36549400  |
| H  | 3.41022700  | 1.31694700  | 1.38012600  |
| H  | 4.55990500  | 0.02488000  | 1.12136000  |
| H  | 2.92254300  | -0.43164500 | 3.03927600  |
| H  | 2.99772700  | -1.68293200 | 1.78661700  |
| H  | 0.94189500  | 0.79542700  | 3.35838000  |
| H  | -0.48925600 | 0.42740600  | 2.39298400  |
| H  | 1.77810800  | 2.34945300  | 1.76723700  |
| H  | 0.05440400  | 2.64469300  | 1.74638600  |
| H  | 2.99202800  | 1.19002400  | -2.13287200 |
| H  | 4.04214700  | 1.90088700  | -0.90217200 |
| H  | 1.52189900  | 2.84983400  | -1.57113700 |
| H  | 2.26497100  | 3.17674500  | -0.01575300 |
| H  | -0.88954900 | 2.92529300  | -0.18814600 |
| H  | -1.31703200 | -2.41777000 | 0.02099600  |
| H  | -3.80639700 | -2.19001300 | 0.17010900  |
| H  | -3.29422000 | 2.07657600  | -0.26335300 |
| H  | 3.90181000  | -1.78980600 | -0.46910000 |
| H  | 3.40103000  | -1.08212100 | -2.02856800 |
| H  | 4.85630000  | -0.47485500 | -1.18998900 |
| H  | 1.02995700  | -2.67281800 | 1.92365300  |

|   |             |             |             |
|---|-------------|-------------|-------------|
| H | 0.81933400  | -1.76353900 | 3.44224800  |
| H | -0.46645600 | -1.75493100 | 2.21586300  |
| H | -0.41830500 | 2.04121000  | -1.64743500 |
| O | 1.01378900  | -2.33326500 | -0.57814600 |
| O | 0.95979800  | -0.09214700 | -2.09892100 |
| H | 1.87797400  | -2.76734300 | -0.46118500 |
| O | 0.26304800  | -1.18202300 | -2.78485100 |
| H | 0.87534000  | -1.34209400 | -3.52894900 |
| H | 0.79922500  | -2.38428800 | -1.54304100 |
| N | -5.15762100 | 0.15202300  | 0.06510400  |
| O | -5.59651300 | 1.29602600  | -0.03551100 |
| O | -5.85171400 | -0.84662400 | 0.24482900  |

Cartesian coordinates of reactant state associated with the process of O-O bond formation for Fe<sup>IV</sup>-oxyl radical (S=4) in complex (4):

|    |             |             |             |
|----|-------------|-------------|-------------|
| N  | -2.93062100 | -0.09075300 | -0.37243000 |
| C  | -3.37693300 | -1.00860000 | 0.74062300  |
| C  | -2.59847800 | -0.72736200 | 2.01060900  |
| N  | -1.12412400 | -0.59999900 | 1.76580100  |
| C  | -0.41515900 | -1.90524200 | 1.59794900  |
| C  | -0.67439200 | -2.52832700 | 0.23708500  |
| N  | -0.69442400 | -1.49145200 | -0.87162300 |
| C  | -2.96918000 | -0.78649700 | -1.70234700 |
| C  | -1.80618800 | -1.78116200 | -1.85912800 |
| C  | 0.63539900  | -1.41741600 | -1.55968500 |
| C  | 1.58864000  | -0.59843200 | -0.74244600 |
| N  | 1.02064000  | 0.37628400  | 0.00198400  |
| C  | 1.77379200  | 1.24454400  | 0.69809200  |
| C  | 3.16062400  | 1.16697100  | 0.68966600  |
| C  | 3.73393400  | 0.15055600  | -0.06172200 |
| C  | 2.96992100  | -0.75027100 | -0.78914200 |
| Fe | -0.98818300 | 0.42456000  | -0.10394600 |
| C  | -3.81504100 | 1.11229500  | -0.42341100 |
| C  | -0.53810200 | 0.08433000  | 2.95243900  |
| H  | -3.27639100 | -2.03856100 | 0.40849600  |
| H  | -4.44234500 | -0.83733000 | 0.91774000  |
| H  | -2.78799600 | -1.51227700 | 2.75103900  |
| H  | -2.92631500 | 0.22423600  | 2.43246800  |
| H  | -0.72336300 | -2.60328300 | 2.38482300  |
| H  | 0.64963600  | -1.70952400 | 1.73156200  |
| H  | -1.62395800 | -3.05484700 | 0.22690600  |
| H  | 0.09928100  | -3.26873300 | 0.01881600  |
| H  | -2.90789200 | -0.00947500 | -2.46272200 |

|   |             |             |             |
|---|-------------|-------------|-------------|
| H | -3.93716300 | -1.28797600 | -1.80016600 |
| H | -1.41041800 | -1.70307300 | -2.87123100 |
| H | -2.13325800 | -2.81106900 | -1.71616800 |
| H | 1.02269500  | -2.41983000 | -1.75895400 |
| H | 1.24926400  | 2.00765200  | 1.25850800  |
| H | 3.75693200  | 1.87342500  | 1.25130200  |
| H | 3.42121700  | -1.53989400 | -1.37581100 |
| H | -3.86535300 | 1.56410100  | 0.56681500  |
| H | -3.41501200 | 1.82847400  | -1.14032600 |
| H | -4.81485800 | 0.79292300  | -0.73475300 |
| H | -0.98146500 | 1.07261000  | 3.06294200  |
| H | -0.74324200 | -0.51185500 | 3.84915700  |
| H | 0.54146800  | 0.17998000  | 2.83550900  |
| H | 0.49505500  | -0.90821000 | -2.51736000 |
| O | -1.23677400 | 1.89565800  | 0.81231800  |
| O | -0.91027600 | 1.09842800  | -1.59883100 |
| H | -2.22086800 | 2.06612100  | 0.92906800  |
| O | -0.78782100 | 3.37897300  | -1.58631900 |
| H | 0.15413800  | 3.60556300  | -1.47674800 |
| H | -0.99758800 | 2.88454900  | -0.77455900 |
| N | 5.20562500  | 0.02185400  | -0.09285500 |
| O | 5.68527000  | -0.87509400 | -0.78234000 |
| O | 5.86236400  | 0.81969000  | 0.57158500  |

Cartesian coordinates of transient state (TS2b) associated with the process of O-O bond formation for Fe<sup>IV</sup>-oxyl radical (S=4) in complex (4):

|    |             |             |             |
|----|-------------|-------------|-------------|
| N  | -2.93011900 | -0.09846900 | -0.36321900 |
| C  | -3.36850500 | -1.01526600 | 0.74452900  |
| C  | -2.58165400 | -0.72786600 | 2.01139000  |
| N  | -1.11363700 | -0.59280200 | 1.76062800  |
| C  | -0.41093900 | -1.89332500 | 1.58971200  |
| C  | -0.67625100 | -2.51400200 | 0.22864300  |
| N  | -0.70369900 | -1.47892400 | -0.87236300 |
| C  | -2.97237100 | -0.78238500 | -1.69298100 |
| C  | -1.80971000 | -1.76940100 | -1.85711800 |
| C  | 0.62250500  | -1.40192500 | -1.56103700 |
| C  | 1.58262200  | -0.59727600 | -0.73302700 |
| N  | 1.01341100  | 0.37021300  | 0.01331700  |
| C  | 1.76633400  | 1.23483000  | 0.71255000  |
| C  | 3.15180900  | 1.15474700  | 0.70863500  |
| C  | 3.72369600  | 0.14249700  | -0.04419100 |
| C  | 2.96080300  | -0.75160100 | -0.77757900 |
| Fe | -0.98097700 | 0.40856600  | -0.09331700 |



|   |             |             |             |
|---|-------------|-------------|-------------|
| C | -3.84158000 | 1.08366800  | -0.42578500 |
| C | -0.51820900 | 0.09167600  | 2.94151900  |
| H | -3.25857800 | -2.04477300 | 0.41129100  |
| H | -4.43558800 | -0.85869000 | 0.92837500  |
| H | -2.76760300 | -1.51012200 | 2.75618600  |
| H | -2.91198500 | 0.22085300  | 2.43981800  |
| H | -0.70849100 | -2.59468300 | 2.37838700  |
| H | 0.65457800  | -1.69555900 | 1.71595400  |
| H | -1.62523100 | -3.04317900 | 0.22253100  |
| H | 0.09567300  | -3.25514700 | 0.00439600  |
| H | -2.91088100 | 0.00020700  | -2.44888600 |
| H | -3.93819100 | -1.28762200 | -1.79977100 |
| H | -1.41728000 | -1.68356000 | -2.87002500 |
| H | -2.13304700 | -2.80268400 | -1.72457000 |
| H | 1.00639200  | -2.40369100 | -1.77452500 |
| H | 1.23810600  | 1.99440300  | 1.27869500  |
| H | 3.75766000  | 1.85265500  | 1.27365500  |
| H | 3.42565000  | -1.53373100 | -1.36668300 |
| H | -3.93871700 | 1.53088500  | 0.56397600  |
| H | -3.45359100 | 1.81519400  | -1.13591100 |
| H | -4.83328900 | 0.75463300  | -0.75034700 |
| H | -0.95141300 | 1.08398300  | 3.05076500  |
| H | -0.70929200 | -0.49524200 | 3.84727400  |
| H | 0.55970900  | 0.18450800  | 2.80815300  |
| H | 0.48139200  | -0.88021300 | -2.51236400 |
| O | -1.23738200 | 2.06857300  | 0.87127200  |
| O | -0.90258600 | 1.20388700  | -1.64385100 |
| H | -2.18290500 | 2.27267500  | 1.02332900  |
| O | -1.01856006 | 2.95736184  | -1.42273610 |
| H | -1.98882406 | 2.98935384  | -1.48791910 |
| H | -1.16012888 | 2.66887156  | -0.15196177 |
| N | 5.19228800  | 0.00878200  | -0.07249900 |
| O | 5.64006900  | -0.89229500 | -0.76373900 |
| O | 5.82282000  | 0.80570000  | 0.60241400  |

Cartesian coordinates of product state associated with the process of O-O bond formation for Fe<sup>IV</sup>-oxyl radical (S=4) in complex (4):

|   |            |             |             |
|---|------------|-------------|-------------|
| N | 3.00556400 | 0.12972400  | -0.33652300 |
| C | 3.49559400 | 0.27631100  | 1.07593000  |
| C | 2.70984300 | -0.64790200 | 1.98610400  |
| N | 1.23031300 | -0.56632700 | 1.73666200  |
| C | 0.57866400 | 0.64339300  | 2.33561900  |
| C | 0.82139400 | 1.90192100  | 1.51303600  |

|    |             |             |             |
|----|-------------|-------------|-------------|
| N  | 0.80617000  | 1.62271600  | 0.01882300  |
| C  | 3.06817100  | 1.42980300  | -1.07324500 |
| C  | 1.92052400  | 2.37772900  | -0.67331500 |
| C  | -0.53148800 | 1.96281100  | -0.56317300 |
| C  | -1.51359900 | 0.85878200  | -0.28549300 |
| N  | -0.98675300 | -0.38404500 | -0.19206700 |
| C  | -1.79425600 | -1.44825000 | -0.03756100 |
| C  | -3.17488200 | -1.32101400 | 0.04362600  |
| C  | -3.69681600 | -0.03677300 | -0.03585900 |
| C  | -2.88587600 | 1.07629400  | -0.20156100 |
| Fe | 1.01246600  | -0.34577400 | -0.30066600 |
| C  | 3.84299800  | -0.86980300 | -1.05450700 |
| C  | 0.61294800  | -1.76821500 | 2.36549400  |
| H  | 3.41022700  | 1.31694700  | 1.38012600  |
| H  | 4.55990500  | 0.02488000  | 1.12136000  |
| H  | 2.92254300  | -0.43164500 | 3.03927600  |
| H  | 2.99772700  | -1.68293200 | 1.78661700  |
| H  | 0.94189500  | 0.79542700  | 3.35838000  |
| H  | -0.48925600 | 0.42740600  | 2.39298400  |
| H  | 1.77810800  | 2.34945300  | 1.76723700  |
| H  | 0.05440400  | 2.64469300  | 1.74638600  |
| H  | 2.99202800  | 1.19002400  | -2.13287200 |
| H  | 4.04214700  | 1.90088700  | -0.90217200 |
| H  | 1.52189900  | 2.84983400  | -1.57113700 |
| H  | 2.26497100  | 3.17674500  | -0.01575300 |
| H  | -0.88954900 | 2.92529300  | -0.18814600 |
| H  | -1.31703200 | -2.41777000 | 0.02099600  |
| H  | -3.80639700 | -2.19001300 | 0.17010900  |
| H  | -3.29422000 | 2.07657600  | -0.26335300 |
| H  | 3.90181000  | -1.78980600 | -0.46910000 |
| H  | 3.40103000  | -1.08212100 | -2.02856800 |
| H  | 4.85630000  | -0.47485500 | -1.18998900 |
| H  | 1.02995700  | -2.67281800 | 1.92365300  |
| H  | 0.81933400  | -1.76353900 | 3.44224800  |
| H  | -0.46645600 | -1.75493100 | 2.21586300  |
| H  | -0.41830500 | 2.04121000  | -1.64743500 |
| O  | 1.01378900  | -2.33326500 | -0.57814600 |
| O  | 0.95979800  | -0.09214700 | -2.09892100 |
| H  | 1.87797400  | -2.76734300 | -0.46118500 |
| O  | 0.26304800  | -1.18202300 | -2.78485100 |
| H  | 0.87534000  | -1.34209400 | -3.52894900 |
| H  | 0.79922500  | -2.38428800 | -1.54304100 |
| N  | -5.15762100 | 0.15202300  | 0.06510400  |
| O  | -5.59651300 | 1.29602600  | -0.03551100 |

0                    -5.85171400        -0.84662400        0.24482900

Cartesian coordinates of reactant state associated with the process of the water rotation for Fe<sup>IV</sup>-oxyl radical (S=4) in complex (5):

|    |             |             |             |
|----|-------------|-------------|-------------|
| N  | -2.26653800 | -0.11722300 | -0.26197200 |
| C  | -2.61330700 | -1.14288400 | 0.77295100  |
| C  | -1.76887500 | -0.94114900 | 2.01067500  |
| N  | -0.32856000 | -0.73637500 | 1.68538300  |
| C  | 0.40835900  | -1.98806700 | 1.37428200  |
| C  | 0.08653500  | -2.51002100 | -0.01235000 |
| N  | -0.06052800 | -1.39028700 | -1.01029500 |
| C  | -2.38250300 | -0.68566600 | -1.63435800 |
| C  | -1.21869000 | -1.63638900 | -1.93774800 |
| C  | 1.20907700  | -1.20516500 | -1.76861600 |
| C  | 2.18858400  | -0.46681300 | -0.91162500 |
| N  | 1.63108500  | 0.42749500  | -0.07071700 |
| C  | 2.39736900  | 1.22449900  | 0.68780900  |
| C  | 3.77791700  | 1.13693400  | 0.64543100  |
| C  | 4.36730300  | 0.20144800  | -0.19859000 |
| C  | 3.56254400  | -0.61142500 | -0.98948900 |
| Fe | -0.34571600 | 0.42456700  | -0.07476000 |
| C  | -3.17787400 | 1.04891900  | -0.14047600 |
| C  | 0.30520300  | -0.13138700 | 2.88067600  |
| H  | -2.49227700 | -2.13477300 | 0.34435000  |
| H  | -3.67123500 | -1.03778000 | 1.02591100  |
| H  | -1.88341800 | -1.78929900 | 2.69373800  |
| H  | -2.10196100 | -0.03959100 | 2.52861700  |
| H  | 0.17686600  | -2.75520000 | 2.12051300  |
| H  | 1.47256900  | -1.76083200 | 1.45395700  |
| H  | -0.83007100 | -3.09269800 | -0.00216700 |
| H  | 0.88057700  | -3.18295800 | -0.34347600 |
| H  | -2.37688700 | 0.15545700  | -2.32664700 |
| H  | -3.34579700 | -1.19648800 | -1.72100800 |
| H  | -0.89281600 | -1.47794100 | -2.96481500 |
| H  | -1.51800700 | -2.68039700 | -1.85014000 |
| H  | 1.59834500  | -2.16674000 | -2.11009300 |
| H  | 4.37322400  | 1.79109600  | 1.27043900  |
| H  | 5.44653100  | 0.10434200  | -0.24301100 |
| H  | 3.98448500  | -1.34857900 | -1.66255700 |
| H  | -3.17108700 | 1.40695500  | 0.88834000  |
| H  | -2.84226300 | 1.84131300  | -0.80898900 |
| H  | -4.18822800 | 0.73288800  | -0.41657700 |
| H  | -0.15887300 | 0.82968200  | 3.09541500  |

|   |             |             |             |
|---|-------------|-------------|-------------|
| H | 0.17335000  | -0.80337000 | 3.73578400  |
| H | 1.37218800  | 0.01119000  | 2.70907000  |
| H | 0.99675100  | -0.58957600 | -2.64639100 |
| O | -0.59416600 | 1.79298400  | 0.96545900  |
| O | -0.37238000 | 1.20724300  | -1.50062200 |
| H | -0.73853700 | 2.61656100  | 0.42317300  |
| O | -1.02170700 | 3.89724700  | -0.66666700 |
| H | -0.95085300 | 3.33231900  | -1.45245400 |
| H | -1.97459600 | 4.04426000  | -0.57659000 |
| F | 1.75069536  | 2.10309640  | 1.48303212  |

Cartesian coordinates of reactant state associated with the process of O-O bond formation for Fe<sup>IV</sup>-oxyl radical (S=2) in complex (5):

|    |             |             |             |
|----|-------------|-------------|-------------|
| N  | -2.25561400 | 0.08106000  | -0.18740000 |
| C  | -2.66620400 | -0.85618200 | 0.90856200  |
| C  | -1.77919000 | -0.67264000 | 2.11701300  |
| N  | -0.33407200 | -0.61304200 | 1.74960000  |
| C  | 0.28101000  | -1.94384000 | 1.48127300  |
| C  | -0.14256500 | -2.51823100 | 0.14607700  |
| N  | -0.23993500 | -1.45224900 | -0.91774600 |
| C  | -2.48103100 | -0.53734500 | -1.52437800 |
| C  | -1.46331600 | -1.64728000 | -1.77695100 |
| C  | 0.98892700  | -1.45289800 | -1.76160500 |
| C  | 2.10991500  | -0.82564600 | -0.99939200 |
| N  | 1.72487600  | 0.18374100  | -0.17740500 |
| C  | 2.66703000  | 0.86300700  | 0.47024500  |
| C  | 4.01881000  | 0.58632700  | 0.37691600  |
| C  | 4.40206600  | -0.46077400 | -0.44357400 |
| C  | 3.43396500  | -1.17960900 | -1.14413100 |
| Fe | -0.28756300 | 0.42115200  | -0.08985700 |
| C  | -3.04230400 | 1.33835700  | -0.09800900 |
| C  | 0.38680900  | -0.05689100 | 2.92317500  |
| H  | -2.64515500 | -1.87515900 | 0.53231700  |
| H  | -3.70345300 | -0.63866900 | 1.17319300  |
| H  | -1.95225700 | -1.47393500 | 2.84190600  |
| H  | -2.01723700 | 0.27876600  | 2.59698400  |
| H  | 0.01346700  | -2.64184100 | 2.28122300  |
| H  | 1.36286000  | -1.80472300 | 1.51066100  |
| H  | -1.10154100 | -3.02092900 | 0.22791000  |
| H  | 0.58204200  | -3.27149400 | -0.17035200 |
| H  | -2.38441300 | 0.25657600  | -2.26390000 |
| H  | -3.50469400 | -0.92088200 | -1.56032700 |
| H  | -1.17068400 | -1.63211900 | -2.82582900 |

|   |             |             |             |
|---|-------------|-------------|-------------|
| H | -1.87920000 | -2.63215800 | -1.56876000 |
| H | 1.22549600  | -2.46822500 | -2.08631900 |
| H | 4.72349900  | 1.18258300  | 0.94247900  |
| H | 5.45095000  | -0.71741600 | -0.53994600 |
| H | 3.69952500  | -2.00217400 | -1.79666900 |
| H | -2.96700900 | 1.74152500  | 0.91110400  |
| H | -2.65658800 | 2.06395700  | -0.81269800 |
| H | -4.08611500 | 1.10426900  | -0.32728100 |
| H | -0.02213300 | 0.91100800  | 3.21250300  |
| H | 0.26185400  | -0.73973400 | 3.77003500  |
| H | 1.44874300  | 0.04336300  | 2.70900800  |
| H | 0.79584700  | -0.84414300 | -2.64801800 |
| O | -0.40205700 | 1.98165600  | 0.71118600  |
| O | -0.27670800 | 1.08913800  | -1.57140300 |
| H | -0.55206735 | 1.95594420  | 1.66905038  |
| O | 0.85474940  | 3.29069139  | -1.07993703 |
| H | 1.71594813  | 3.52248623  | -0.70613225 |
| H | 0.41542711  | 2.87339446  | -0.31731909 |
| F | 2.26212000  | 1.85145500  | 1.24587400  |

Cartesian coordinates of transient state (TS<sub>2</sub>) associated with the process of O-O bond formation for Fe<sup>IV</sup>-oxyl radical (S=2) in complex (5):

|    |             |             |             |
|----|-------------|-------------|-------------|
| N  | -2.39407900 | -0.01904000 | -0.39251500 |
| C  | -2.81791100 | -0.97045100 | 0.68433500  |
| C  | -2.05327000 | -0.68905000 | 1.96563900  |
| N  | -0.57055800 | -0.54756100 | 1.74889700  |
| C  | 0.15060200  | -1.84759400 | 1.56358900  |
| C  | -0.06402600 | -2.48041100 | 0.19237300  |
| N  | -0.12949900 | -1.47236000 | -0.92289700 |
| C  | -2.38041200 | -0.65568100 | -1.73490700 |
| C  | -1.28139800 | -1.73176600 | -1.84868600 |
| C  | 1.16193300  | -1.38673200 | -1.64885300 |
| C  | 2.19665000  | -0.67296500 | -0.81723000 |
| N  | 1.73302700  | 0.29848400  | -0.00406500 |
| C  | 2.59360100  | 1.04101800  | 0.71772100  |
| C  | 3.96527500  | 0.82882300  | 0.66400900  |
| C  | 4.45407300  | -0.18608700 | -0.15879900 |
| C  | 3.55852000  | -0.94723700 | -0.90772600 |
| Fe | -0.36199600 | 0.58507600  | -0.02731800 |
| C  | -3.25831300 | 1.18907500  | -0.39693300 |
| C  | -0.00376500 | 0.10603500  | 2.96465300  |
| H  | -2.67444100 | -1.99115100 | 0.33760000  |
| H  | -3.89054400 | -0.85288600 | 0.87138600  |

|   |             |             |             |
|---|-------------|-------------|-------------|
| H | -2.24043900 | -1.47417400 | 2.70701800  |
| H | -2.39206800 | 0.26089500  | 2.38532200  |
| H | -0.16967400 | -2.54826600 | 2.34375800  |
| H | 1.20849800  | -1.64040200 | 1.72558300  |
| H | -0.97917400 | -3.06768400 | 0.18795500  |
| H | 0.75469700  | -3.18274100 | 0.00354900  |
| H | -2.20763000 | 0.14200800  | -2.45766800 |
| H | -3.36130100 | -1.09965800 | -1.94328500 |
| H | -0.92256900 | -1.74995900 | -2.87925600 |
| H | -1.68694000 | -2.72275600 | -1.63905700 |
| H | 1.51625800  | -2.38154900 | -1.94049600 |
| H | 4.62757500  | 1.44430700  | 1.26228700  |
| H | 5.51965300  | -0.38524500 | -0.21422000 |
| H | 3.90080800  | -1.74595600 | -1.55700000 |
| H | -3.27406200 | 1.63042200  | 0.60171700  |
| H | -2.86370200 | 1.91624800  | -1.10867900 |
| H | -4.28008200 | 0.91440700  | -0.68506200 |
| H | -0.49849400 | 1.06062800  | 3.14117700  |
| H | -0.16047500 | -0.54630300 | 3.83181100  |
| H | 1.06588700  | 0.26929900  | 2.83267100  |
| H | 0.99749500  | -0.80745200 | -2.56266800 |
| O | -0.53114000 | 2.26345100  | 0.97070500  |
| O | -0.28213600 | 1.32645800  | -1.57727800 |
| H | -1.41518000 | 2.39225900  | 1.24297300  |
| O | -0.33415610 | 3.22685606  | -1.59496030 |
| H | -1.28382410 | 3.43142706  | -1.70513830 |
| H | -0.38735800 | 2.99950600  | -0.27796500 |
| F | 2.05442500  | 2.00252700  | 1.49700900  |

Cartesian coordinates of product state associated with the process of O-O bond formation for Fe<sup>IV</sup>-oxyl radical (S=2) in complex (5):

|   |             |             |             |
|---|-------------|-------------|-------------|
| N | -2.25976000 | -0.48118500 | 0.02574300  |
| C | -2.81861400 | 0.90495400  | 0.07832800  |
| C | -2.07382000 | 1.78718300  | -0.89863700 |
| N | -0.59703800 | 1.62238200  | -0.78595200 |
| C | -0.00062500 | 2.36314600  | 0.35702100  |
| C | -0.24958900 | 1.67505300  | 1.68838000  |
| N | -0.20767200 | 0.17162300  | 1.55844800  |
| C | -2.33240200 | -1.13324900 | 1.35698800  |
| C | -1.33489600 | -0.48326100 | 2.31644500  |
| C | 1.10062400  | -0.34799300 | 2.04481800  |
| C | 2.16314500  | -0.05037300 | 1.03501400  |
| N | 1.73233800  | -0.07138400 | -0.25087200 |

|    |             |             |             |
|----|-------------|-------------|-------------|
| C  | 2.63727900  | 0.10387200  | -1.20458600 |
| C  | 3.98428900  | 0.32575300  | -0.97793300 |
| C  | 4.40894400  | 0.36598800  | 0.33941500  |
| C  | 3.48389200  | 0.17529600  | 1.36462600  |
| Fe | -0.27793159 | -0.36881497 | -0.38926438 |
| C  | -3.05410500 | -1.27363500 | -0.94410100 |
| C  | -0.00398200 | 2.17896700  | -2.02543800 |
| H  | -2.75992100 | 1.28113300  | 1.09675900  |
| H  | -3.88058700 | 0.87787100  | -0.17922400 |
| H  | -2.34902400 | 2.83761600  | -0.75707700 |
| H  | -2.34168500 | 1.50074200  | -1.91855900 |
| H  | -0.39385800 | 3.38500000  | 0.39124000  |
| H  | 1.07136300  | 2.42832500  | 0.16562900  |
| H  | -1.21263700 | 1.96685000  | 2.09759100  |
| H  | 0.50667600  | 1.99451500  | 2.40873800  |
| H  | -2.09022000 | -2.18353000 | 1.20701800  |
| H  | -3.35257900 | -1.05597900 | 1.74709900  |
| H  | -0.92723700 | -1.24238800 | 2.98334200  |
| H  | -1.81274600 | 0.26938200  | 2.94287400  |
| H  | 1.33466000  | 0.07248000  | 3.02553500  |
| H  | 4.65338900  | 0.46297100  | -1.81787400 |
| H  | 5.45378200  | 0.54492100  | 0.56713600  |
| H  | 3.77911700  | 0.19997400  | 2.40660500  |
| H  | -3.12048800 | -0.73824500 | -1.89185700 |
| H  | -2.59053600 | -2.24422600 | -1.10929300 |
| H  | -4.06247800 | -1.41823700 | -0.54359500 |
| H  | -0.34625900 | 1.61694800  | -2.89455700 |
| H  | -0.30924900 | 3.22554200  | -2.13777600 |
| H  | 1.08238800  | 2.13976100  | -1.97501700 |
| H  | 1.01856800  | -1.43274400 | 2.14261100  |
| O  | -0.46083707 | -0.97057072 | -2.33929336 |
| O  | 0.03574655  | -2.08851884 | 0.11731696  |
| H  | -1.20386129 | -0.55870435 | -2.80690697 |
| O  | 0.54095958  | -2.97633724 | -0.89230335 |
| H  | -0.19321538 | -3.59668173 | -1.02569311 |
| H  | -0.64746691 | -1.93350233 | -2.21107734 |
| F  | 2.19748200  | 0.06137400  | -2.45282600 |

Cartesian coordinates of reactant state associated with the process of O-O bond formation for Fe<sup>IV</sup>-oxyl radical (S=4) in complex (5):

|   |             |             |             |
|---|-------------|-------------|-------------|
| N | -2.25330000 | 0.07762100  | -0.18095800 |
| C | -2.66397400 | -0.84023600 | 0.92974500  |
| C | -1.75309400 | -0.65969900 | 2.12209300  |

|    |             |             |             |
|----|-------------|-------------|-------------|
| N  | -0.31331300 | -0.62898600 | 1.72907500  |
| C  | 0.26615800  | -1.97452100 | 1.45703200  |
| C  | -0.18736900 | -2.53720200 | 0.12754100  |
| N  | -0.24948400 | -1.47142100 | -0.93774300 |
| C  | -2.50531000 | -0.54968500 | -1.50924800 |
| C  | -1.47068600 | -1.63990100 | -1.80342500 |
| C  | 0.99679700  | -1.49409700 | -1.76077400 |
| C  | 2.09689600  | -0.83770500 | -0.98922900 |
| N  | 1.68550400  | 0.16871900  | -0.19215100 |
| C  | 2.57071000  | 0.91071800  | 0.48886700  |
| C  | 3.92709000  | 0.64801200  | 0.41243800  |
| C  | 4.36529000  | -0.40427600 | -0.38439600 |
| C  | 3.43843500  | -1.15732800 | -1.09778900 |
| Fe | -0.27536400 | 0.39858200  | -0.11792900 |
| C  | -3.01542500 | 1.34920500  | -0.08997000 |
| C  | 0.44481100  | -0.07921400 | 2.88100300  |
| H  | -2.66710700 | -1.86284500 | 0.56288100  |
| H  | -3.69300600 | -0.60355500 | 1.21031100  |
| H  | -1.92644600 | -1.45044400 | 2.85855500  |
| H  | -1.96780000 | 0.30036300  | 2.59587400  |
| H  | -0.00877400 | -2.66512700 | 2.26085700  |
| H  | 1.35138000  | -1.86296700 | 1.47246700  |
| H  | -1.16406200 | -3.00311700 | 0.21439100  |
| H  | 0.50524800  | -3.31869700 | -0.19155800 |
| H  | -2.44708400 | 0.24476800  | -2.25214700 |
| H  | -3.52172900 | -0.95336700 | -1.51600900 |
| H  | -1.17508400 | -1.57568600 | -2.84948100 |
| H  | -1.87539000 | -2.63802400 | -1.63896700 |
| H  | 1.24092700  | -2.51722600 | -2.05353000 |
| H  | 4.61908700  | 1.26107600  | 0.97656200  |
| H  | 5.42239100  | -0.63648600 | -0.45294700 |
| H  | 3.74152400  | -1.98129100 | -1.73296400 |
| H  | -2.91732000 | 1.75766100  | 0.91546500  |
| H  | -2.62531700 | 2.06423200  | -0.81310000 |
| H  | -4.06768900 | 1.13783900  | -0.30227900 |
| H  | 0.05066000  | 0.89072600  | 3.18465700  |
| H  | 0.34375500  | -0.76220900 | 3.73106100  |
| H  | 1.50061100  | 0.01703300  | 2.62959000  |
| H  | 0.81972700  | -0.90921600 | -2.66653400 |
| O  | -0.28252500 | 1.96499700  | 0.69305900  |
| O  | -0.27932000 | 1.06384200  | -1.60078600 |
| H  | -0.38899500 | 1.93315200  | 1.65627600  |
| O  | -0.89857700 | 3.92710100  | -1.23713200 |
| H  | -0.79092400 | 3.26647100  | -1.93506300 |



|   |             |            |             |
|---|-------------|------------|-------------|
| H | -0.73655900 | 3.39526100 | -0.43677500 |
| F | 2.06732301  | 1.91446423 | 1.23826344  |

Cartesian coordinates of transient state (TS<sub>2b</sub>) associated with the process of O-O bond formation for Fe<sup>IV</sup>-oxyl radical (S=4) in complex (5):

|    |             |             |             |
|----|-------------|-------------|-------------|
| N  | -2.39407900 | -0.01904000 | -0.39251500 |
| C  | -2.81791100 | -0.97045100 | 0.68433500  |
| C  | -2.05327000 | -0.68905000 | 1.96563900  |
| N  | -0.57055800 | -0.54756100 | 1.74889700  |
| C  | 0.15060200  | -1.84759400 | 1.56358900  |
| C  | -0.06402600 | -2.48041100 | 0.19237300  |
| N  | -0.12949900 | -1.47236000 | -0.92289700 |
| C  | -2.38041200 | -0.65568100 | -1.73490700 |
| C  | -1.28139800 | -1.73176600 | -1.84868600 |
| C  | 1.16193300  | -1.38673200 | -1.64885300 |
| C  | 2.19665000  | -0.67296500 | -0.81723000 |
| N  | 1.73302700  | 0.29848400  | -0.00406500 |
| C  | 2.59360100  | 1.04101800  | 0.71772100  |
| C  | 3.96527500  | 0.82882300  | 0.66400900  |
| C  | 4.45407300  | -0.18608700 | -0.15879900 |
| C  | 3.55852000  | -0.94723700 | -0.90772600 |
| Fe | -0.36199600 | 0.58507600  | -0.02731800 |
| C  | -3.25831300 | 1.18907500  | -0.39693300 |
| C  | -0.00376500 | 0.10603500  | 2.96465300  |
| H  | -2.67444100 | -1.99115100 | 0.33760000  |
| H  | -3.89054400 | -0.85288600 | 0.87138600  |
| H  | -2.24043900 | -1.47417400 | 2.70701800  |
| H  | -2.39206800 | 0.26089500  | 2.38532200  |
| H  | -0.16967400 | -2.54826600 | 2.34375800  |
| H  | 1.20849800  | -1.64040200 | 1.72558300  |
| H  | -0.97917400 | -3.06768400 | 0.18795500  |
| H  | 0.75469700  | -3.18274100 | 0.00354900  |
| H  | -2.20763000 | 0.14200800  | -2.45766800 |
| H  | -3.36130100 | -1.09965800 | -1.94328500 |
| H  | -0.92256900 | -1.74995900 | -2.87925600 |
| H  | -1.68694000 | -2.72275600 | -1.63905700 |
| H  | 1.51625800  | -2.38154900 | -1.94049600 |
| H  | 4.62757500  | 1.44430700  | 1.26228700  |
| H  | 5.51965300  | -0.38524500 | -0.21422000 |
| H  | 3.90080800  | -1.74595600 | -1.55700000 |
| H  | -3.27406200 | 1.63042200  | 0.60171700  |
| H  | -2.86370200 | 1.91624800  | -1.10867900 |
| H  | -4.28008200 | 0.91440700  | -0.68506200 |

|   |             |             |             |
|---|-------------|-------------|-------------|
| H | -0.49849400 | 1.06062800  | 3.14117700  |
| H | -0.16047500 | -0.54630300 | 3.83181100  |
| H | 1.06588700  | 0.26929900  | 2.83267100  |
| H | 0.99749500  | -0.80745200 | -2.56266800 |
| O | -0.53114000 | 2.26345100  | 0.97070500  |
| O | -0.28213600 | 1.32645800  | -1.57727800 |
| H | -1.41518000 | 2.39225900  | 1.24297300  |
| O | -0.33415600 | 3.22685600  | -1.59496000 |
| H | -1.28382400 | 3.43142700  | -1.70513800 |
| H | -0.38735800 | 2.99950600  | -0.27796500 |
| F | 2.05442500  | 2.00252700  | 1.49700900  |

Cartesian coordinates of product state associated with the process of O-O bond formation for Fe<sup>IV</sup>-oxyl radical (S=4) in complex (5):

|    |             |             |             |
|----|-------------|-------------|-------------|
| N  | 2.36496700  | -0.03683300 | -0.43104000 |
| C  | 2.86247400  | 0.63304000  | 0.80309900  |
| C  | 2.11072300  | 0.10892400  | 2.00913400  |
| N  | 0.63300300  | 0.07450700  | 1.78801800  |
| C  | -0.02504500 | 1.40647100  | 1.92662400  |
| C  | 0.21102400  | 2.34626500  | 0.74714000  |
| N  | 0.22644500  | 1.63830300  | -0.56196200 |
| C  | 2.37489000  | 0.87551700  | -1.59565700 |
| C  | 1.37627000  | 2.02983200  | -1.41884200 |
| C  | -1.06591100 | 1.74998500  | -1.25549400 |
| C  | -2.10166900 | 0.89323400  | -0.57738400 |
| N  | -1.65454000 | -0.25280100 | -0.03497400 |
| C  | -2.52231800 | -1.10982500 | 0.52365800  |
| C  | -3.87978200 | -0.84644700 | 0.57933400  |
| C  | -4.34905900 | 0.34666800  | 0.03845400  |
| C  | -3.44825500 | 1.22721700  | -0.54781800 |
| Fe | 0.38156300  | -0.57634800 | -0.13699100 |
| C  | 3.17363700  | -1.24040500 | -0.72177000 |
| C  | 0.05104200  | -0.81603600 | 2.82039200  |
| H  | 2.75340200  | 1.70948800  | 0.69635200  |
| H  | 3.93254200  | 0.43859700  | 0.92422900  |
| H  | 2.34000000  | 0.70326100  | 2.90007400  |
| H  | 2.41683500  | -0.92253100 | 2.20147900  |
| H  | 0.32688000  | 1.88153900  | 2.84892300  |
| H  | -1.09263900 | 1.21381900  | 2.04229300  |
| H  | 1.15054700  | 2.87983500  | 0.87449000  |
| H  | -0.57807300 | 3.10540300  | 0.75336000  |
| H  | 2.11236100  | 0.27517400  | -2.46786300 |
| H  | 3.38552400  | 1.27133200  | -1.74778600 |

|   |             |             |             |
|---|-------------|-------------|-------------|
| H | 1.01986500  | 2.33130800  | -2.40565800 |
| H | 1.86708100  | 2.90336900  | -0.98665800 |
| H | -1.40425600 | 2.79039800  | -1.31538900 |
| H | -4.54853500 | -1.56127100 | 1.04348700  |
| H | -5.40575200 | 0.58927400  | 0.07548600  |
| H | -3.77599100 | 2.16564100  | -0.98074700 |
| H | 3.19347900  | -1.88741600 | 0.15797700  |
| H | 2.73028200  | -1.78143700 | -1.55854400 |
| H | 4.19968900  | -0.95165300 | -0.97561600 |
| H | 0.49176700  | -1.80889200 | 2.74028800  |
| H | 0.25442800  | -0.40406700 | 3.81527400  |
| H | -1.02803100 | -0.88869800 | 2.68232200  |
| H | -0.94063100 | 1.37599200  | -2.27583600 |
| O | 0.36606019  | -2.67682564 | 0.27220864  |
| O | 0.26971300  | -1.00416200 | -1.88937400 |
| H | 1.20878218  | -3.02508349 | 0.60222763  |
| O | 0.24319085  | -2.38986162 | -2.36892419 |
| H | 1.12286345  | -2.62096872 | -2.71053027 |
| H | 0.28942387  | -3.00757681 | -0.64198729 |
| F | -2.00186500 | -2.24609100 | 1.03407800  |

Cartesian coordinates of complex (6):

|    |             |             |             |
|----|-------------|-------------|-------------|
| N  | -2.29314700 | -0.06539500 | -0.30081800 |
| C  | -2.68860500 | -1.09439800 | 0.72884500  |
| C  | -1.86237000 | -0.93058100 | 1.98870000  |
| N  | -0.39967000 | -0.77260200 | 1.69789200  |
| C  | 0.30443700  | -2.05094700 | 1.37242100  |
| C  | 0.00892700  | -2.53709300 | -0.03862300 |
| N  | -0.07437800 | -1.39161300 | -1.03091500 |
| C  | -2.38603100 | -0.62294700 | -1.69020200 |
| C  | -1.22708000 | -1.58785700 | -1.99407100 |
| C  | 1.22568700  | -1.22876700 | -1.76196300 |
| C  | 2.21046000  | -0.50918400 | -0.88965400 |
| N  | 1.66316000  | 0.38643100  | -0.03442800 |
| C  | 2.44436200  | 1.17198500  | 0.73006100  |
| C  | 3.82848000  | 1.07727700  | 0.67422300  |
| C  | 4.40797700  | 0.14443900  | -0.18553800 |
| C  | 3.58910800  | -0.66012500 | -0.97660800 |
| Fe | -0.33450300 | 0.43502500  | -0.06548000 |
| C  | -3.18309000 | 1.12805400  | -0.19131000 |
| C  | 0.23338100  | -0.20723700 | 2.92236200  |
| H  | -2.58836100 | -2.08595400 | 0.29438600  |
| H  | -3.74810900 | -0.95829400 | 0.96309100  |

|   |             |             |             |
|---|-------------|-------------|-------------|
| H | -2.02097900 | -1.78307400 | 2.65881200  |
| H | -2.17406500 | -0.02505900 | 2.51262000  |
| H | 0.02274000  | -2.82598200 | 2.09435800  |
| H | 1.37203600  | -1.86245700 | 1.49118200  |
| H | -0.92569200 | -3.08954100 | -0.07291100 |
| H | 0.79444400  | -3.22670600 | -0.35852800 |
| H | -2.35963300 | 0.22742800  | -2.37007500 |
| H | -3.35514700 | -1.12026600 | -1.79921000 |
| H | -0.87436100 | -1.40550400 | -3.00869700 |
| H | -1.54507200 | -2.62916500 | -1.94207400 |
| H | 1.59989700  | -2.19974100 | -2.09555300 |
| H | 4.43184300  | 1.72421200  | 1.30053900  |
| H | 5.48698500  | 0.04326500  | -0.24097900 |
| H | 4.00323500  | -1.39439400 | -1.65860900 |
| H | -3.20628400 | 1.46583200  | 0.84415500  |
| H | -2.80636300 | 1.92407800  | -0.83290600 |
| H | -4.19069500 | 0.83915300  | -0.50765100 |
| H | -0.21230900 | 0.75925300  | 3.15236100  |
| H | 0.07180300  | -0.89331500 | 3.76203800  |
| H | 1.30565300  | -0.08853700 | 2.76763400  |
| H | 1.03945300  | -0.61283500 | -2.64588700 |
| O | -0.56396700 | 1.81426000  | 0.99323100  |
| O | -0.32203000 | 1.23912000  | -1.49597500 |
| H | -0.66187800 | 2.65185000  | 0.44838800  |
| O | -0.84386700 | 3.96790600  | -0.61294500 |
| H | -0.76756100 | 3.40861700  | -1.40806100 |
| H | -1.79826500 | 4.14909100  | -0.55478200 |
| C | 1.89965782  | 2.29428437  | 1.63022375  |
| H | 2.80927795  | 2.62993293  | 2.08280664  |
| H | 1.48880206  | 3.07939892  | 1.03047991  |
| H | 1.19975402  | 2.02494592  | 2.39343503  |

## REFERENCES

- (1) Chai, J. D.; Head-Gordon, M. Long-range corrected hybrid density functionals with damped atom-atom dispersion corrections. *Phys Chem Chem Phys* **2008**, *10*, 6615-6620.
- (2) Becke, A. D. Density-functional thermochemistry. III. The role of exact exchange. *The Journal of Chemical Physics* **1993**, *98*, 5648.
- (3) <32\_1988PRBDevelopment.pdf>.
- (4) Dunning, T. H. Gaussian basis sets for use in correlated molecular calculations. I. The atoms boron through neon and hydrogen. *The Journal of Chemical Physics* **1989**, *90*, 1007.
- (5) Woon, D. E.; Dunning, T. H. Gaussian basis sets for use in correlated molecular calculations. III. The atoms aluminum through argon. *The Journal of Chemical Physics* **1993**, *98*, 1358.
- (6) <35\_2009JPCBUniversal Solvation Model Based on Solute Electron.pdf>.
- (7) Elstner, M.; Hobza, P.; Frauenheim, T.; Suhai, S.; Kaxiras, E. Hydrogen bonding and stacking interactions of nucleic acid base pairs: A density-functional-theory based treatment. *The Journal of Chemical Physics* **2001**, *114*, 5149-5155.
- (8) Grimme, S.; Antony, J.; Ehrlich, S.; Krieg, H. A consistent and accurate ab initio parametrization of density functional dispersion correction (DFT-D) for the 94 elements H-Pu. *The Journal of Chemical Physics* **2010**, *132*, 154104.
- (9) Neese, F. The ORCA program system. *Wiley Interdisciplinary Reviews: Computational Molecular Science* **2012**, *2*, 73-78.
- (10) Rico, J. F.; López, R.; Aguado, A.; Ema, I.; Ramírez, G. Reference program for molecular calculations with Slater - type orbitals. *Journal of Computational Chemistry* **1998**, *19*, 1284-1293.
- (11) Weigend, F.; Ahlrichs, R. Balanced basis sets of split valence, triple zeta valence and quadruple zeta valence quality for H to Rn: Design and assessment of accuracy. *Physical Chemistry Chemical Physics* **2005**, *7*, 3297-3305.
